# Supplementary material for: Modeling the interinfluence of fertilizer-induced NH 3 emission, nitrogen deposition, and aerosol radiative effects using modified CESM2
Source: Copernicus journal article supplement (doi:10.5194/bg-2021-63), 2021-03-16
Supplement: Supplementary file [file bg-2021-63-AC2-supplement.zip]

# Modeling the interinfluence of fertilizer-induced NH<sub>3</sub> emission, nitrogen deposition, and aerosol radiative effects using modified CESM2

Ka Ming Fung<sup>1,a</sup>, Maria Val Martin<sup>2</sup>, Amos P. K. Tai<sup>1,3</sup>

<sup>1</sup> Graduate Division of Earth and Atmospheric Sciences, The Chinese University of Hong Kong, Sha Tin, Hong Kong

<sup>2</sup> Leverhulme Centre for Climate Change Mitigation, Department of Animal & Plant Sciences, University of Sheffield, Sheffield, UK

<sup>3</sup> Institute of Environment, Energy and Sustainability, and State Key Laboratory of Agrobiotechnology, The Chinese University of Hong Kong, Sha Tin, Hong Kong

<sup>a</sup> Now at: Department of Civil and Environmental Engineering, Massachusetts Institute of Technology, Cambridge, MA, USA

*Correspondence to:* Ka Ming Fung (kamingfung@link.cuhk.edu.hk) & Amos P. K. Tai (amostai@cuhk.edu.hk)

**Abstract.** Global ammonia (NH<sub>3</sub>) emission is expected to continue to rise due to intensified fertilization for growing food to satisfy the increasing demand worldwide. Previous studies focused mainly on estimating the land-to-atmosphere NH<sub>3</sub> injection but seldom addressed the other side of the bidirectional nitrogen exchange – deposition. Ignoring this significant input source of soil mineral nitrogen may lead to an underestimation of NH<sub>3</sub> emissions from natural sources. Here, we used an Earth system model to quantify NH<sub>3</sub>-induced changes in atmospheric composition and the consequent impacts on the Earth's radiative budget and biosphere, as well as the impacts of deposition on NH<sub>3</sub> emissions from the land surface. We implemented a new scheme into the Community Land Model version 5 (CLM5) of the Community Earth System Model version 2 (CESM2) to estimate the volatilization of ammonium salt (NH<sub>4</sub><sup>+</sup>) associated with synthetic and manure fertilizers into gaseous NH<sub>3</sub>. We further parameterized the amount of emitted NH<sub>3</sub> captured in the plant canopy to derive a more accurate quantity of NH<sub>3</sub> that escapes to the atmosphere. Our modified CLM5 estimated that 14 Tg-N yr<sup>-1</sup> of global NH<sub>3</sub> emission is attributable to fertilizers. Interactively coupling terrestrial NH<sub>3</sub> emissions to atmospheric chemistry simulations by the Community Atmospheric Model version 4 with chemistry (CAM4-chem), we found that such emissions favor the formation and deposition of NH<sub>4</sub><sup>+</sup> aerosol, which in turn disrupts the aerosol radiative effect and enhances soil NH<sub>3</sub> volatilization in regions downwind of fertilized croplands. Our fully coupled simulations showed that global-total NH<sub>3</sub> emission is enhanced by 3.3 Tg-N yr<sup>-1</sup>, when 30% more synthetic fertilizer is used compared to the 2000-level fertilization. In synergy with observations and emission inventories, our work provides a useful tool for stakeholders to evaluate the

35 intertwined relations between agricultural trends, fertilize use,  $\text{NH}_3$  emission, atmospheric aerosols, and climate, so as to derive optimal strategies for securing both food production and environmental sustainability.

## 1. Introduction

40 Global  $\text{NH}_3$  emission has risen from 59 to 65 Tg-N  $\text{yr}^{-1}$  during 2000–2008, driven mainly by the increasing fertilizer use and manure handling in farms and animal operations (Sutton et al., 2013). After entering the atmosphere,  $\text{NH}_3$  gas readily neutralizes sulfuric acid ( $\text{H}_2\text{SO}_4$ ) and nitric acid ( $\text{HNO}_3$ ), which are derived from the oxidation of sulfur dioxide ( $\text{SO}_2$ ) and nitrogen oxides ( $\text{NO}_x$ ), forming inorganic sulfate-nitrate-ammonium (SNA) aerosols (Behera and  
45 Sharma, 2012). These secondary ammonium ( $\text{NH}_4^+$ ) aerosols can constitute 25–75% of inorganic fine particulate matter ( $\text{PM}_{2.5}$ , particles with an aerodynamic diameter  $<2.5 \mu\text{m}$ ) (Ianniello et al., 2011; Snider et al., 2016), which causes not only haze and smog that lower visibility, but also respiratory and cardiovascular diseases that harm human health (Tie and Cao, 2009; Xing et al., 2016; Yang et al., 2019). In 2010 alone, an estimated 2.6 million  
50 premature deaths were associated with  $\text{PM}_{2.5}$  pollution (Wang et al., 2017). Without proper controls, unbridled use of fertilizer to boost food production for the fast-growing population can further enhance global agricultural  $\text{NH}_3$  emissions by  $\sim 12\%$  in 2050 compared to year-2010 level, posing an even greater health risk via  $\text{PM}_{2.5}$  formation (Bodirsky et al., 2014). The global public health system may have to spend 20–290 billion USD more each year to  
55 compensate for the  $\text{NH}_3$ -derived detrimental effects on air quality and health (Gu et al., 2012; Paulot and Jacob, 2014; Guthrie et al., 2018).

Excessive atmospheric  $\text{NH}_3$  also threatens ecosystems. The highly soluble  $\text{NH}_3$  gas and aerosol  $\text{NH}_4^+$  (together known as  $\text{NH}_y$ ) eventually return to the Earth's surface via dry and wet deposition, thus modifying the terrestrial nitrogen cycle.  $\text{NH}_y$  deposited on canopy foliage can  
60 be taken up and become readily available to promote photosynthesis (Wortman et al., 2012), but if highly concentrated it can also injure plant tissues and suppress biomass growth (Fangmeier et al., 1994; Krupa, 2003). Though  $\text{NH}_y$  deposition can enrich soil nutrients, it also brings several adverse effects, including soil acidification and forest biodiversity loss (Tian and Niu, 2015; Lu et al., 2008). Nitrifying bacteria often oxidize soil  $\text{NH}_4^+$  in excess, and

the resulting  $\text{NO}_3^-$ , which is prone to leaching, can lower soil nutrient content as well as contaminate groundwater, streams, rivers, and coastal waters, causing eutrophication (Lin et al., 2001; Beeckman et al., 2018).  $\text{NH}_y$  directly falling onto natural waters is potentially toxic to aquatic life even in low concentrations, and can deteriorate marine biodiversity (Zhang and Liu, 1994; Shou et al., 2018).

The severity of the aforementioned consequences of excessive reactive nitrogen in the environment has called for better management of these compounds, including better monitoring and mitigation of agricultural  $\text{NH}_3$ . In the recent decade, the space-based Infrared Atmospheric Sounding Interferometer (IASI) has been deployed to gauge atmospheric  $\text{NH}_3$  concentration within air columns (Clarisse et al., 2009). This new ensemble of satellite observations offers significant progress to address previous observational deficiencies and allows daily monitoring of global  $\text{NH}_3$  distribution (Clarisse et al., 2010; Van Damme et al., 2014). Continued refinement in retrieval schemes and incorporation of machine-learning techniques have further improved the sensitivity and reliability of measured  $\text{NH}_3$  concentrations (Van Damme et al., 2017). It enables the creation of near real-time high-resolution maps of atmospheric  $\text{NH}_3$  and the possibility of pinpointing industrial and agricultural emission hotspots with diameters smaller than 50 km (Van Damme et al., 2018). Their works have provided valuable datasets not only for monitoring agricultural emissions but also for benchmarking and improving emission inventories and numerical models.

$\text{NH}_3$  emission inventories are generally compiled by surveyed activity data and empirical emission factors associated with primary sources including animal populations, synthetic nitrogen fertilizers, biomass burning, and natural sources. A  $1^\circ$ -by- $1^\circ$  inventory, which was among the first back then, estimated a global emission of  $54 \text{ Tg-N yr}^{-1}$  for 1990, of which  $34 \text{ Tg-N yr}^{-1}$  is agricultural, excluding field burning, and  $2.4 \text{ Tg-N yr}^{-1}$  from natural soil (Bouwman et al., 1997). Since then, much effort has been put into refining the estimation of anthropogenic emissions. Recent inventories adjusted the estimated agricultural emission in 2000–2010 to  $33\text{--}37 \text{ Tg-N yr}^{-1}$  (Sutton et al., 2013; Janssens-Maenhout et al., 2015; Hoesly et al., 2018). One of the state-of-the-art inventories, the Emissions Database for Global Atmospheric Research (EDGAR) version 4.3.2, provides global anthropogenic emission estimates in  $0.1^\circ$ -by- $0.1^\circ$  resolution for the period 1970–2012 (Crippa et al., 2018). The accuracy of these inventories is not only affected by the integrity of the activity data surveyed,

but also constrained by the suitability of emission factors. Simply adopting emission factors from other countries may result in biases because of regional differences in technologies, farming practices, climate, and soil conditions (Huang et al., 2012). This pitfall has motivated the development of other national and regional inventories in the US (e.g., US Environmental Protection Agency (2014)), China (e.g., Zhang et al. (2018)), and Europe (e.g., European Environment Agency (2013)). These emission inventories are useful tools for source apportionment and input data for forward models but as the  $\text{NH}_3$  emissions are prescribed they do not respond to changes in, e.g., nitrogen deposition and meteorology, making them insufficient for models to represent the full dynamics of the  $\text{NH}_y$  cycle.

The global  $\text{NH}_y$  cycle has proven to be challenging to study because of the various feedback mechanisms within the Earth system. The reactive nature of  $\text{NH}_3$  and the contribution of deposited  $\text{NH}_4^+$  to the re-emission of  $\text{NH}_3$  from natural and agricultural soils have created a convoluted relationship between emissions and deposition.  $\text{NH}_4^+$  particles can be transported along with airflows and dispersed across a more extensive geographical range than the highly reactive gaseous  $\text{NH}_3$ . Such transport can introduce large heterogeneity in the spatial distribution of reactive nitrogen, rendering it not only a local but pan-regional problem (Willem Asman; Mark A. Sutton, 1998). Moreover,  $\text{NH}_3$  volatilization is a temperature-dependent process while the presence of atmospheric  $\text{NH}_3$  affects the composition of aerosols and their radiative forcing, thus in turn modifying the Earth's surface energy budget (Ansari and Pandis, 1998).

In this study, we hence aim to enable modeling of the land-atmosphere bidirectional exchange of  $\text{NH}_y$ , so that we can quantify the dynamically evolving  $\text{NH}_y$  cycle and feedback mechanisms associated with it under a changing environment. We employed the Community Earth System Model version 2 (CESM2), which has state-of-the-art model components representing the land, atmosphere, sea ice, and oceans. These sub-models can run independently or in various coupled configurations (Hurrell et al., 2013). Many studies have employed CESM for studying processes in both the atmospheric and terrestrial nitrogen cycles, e.g.,  $\text{NO}_x$  and  $\text{N}_2\text{O}$  emission (Saikawa et al., 2013, 2014; Zhao et al., 2017), deposition (Lamarque et al., 2013), denitrification and nitrate leaching (Nevison et al., 2016), crop nitrogen uptake (Levis et al., 2018), and reactive nitrogen input to ecosystem associated with synthetic and manure fertilizers (Riddick et al., 2016). Yet, these studies did not consider the

dynamic bidirectional transfer of  $\text{NH}_3$  and  $\text{NH}_4^+$  between the land and atmosphere. To add the dynamic cycle of  $\text{NH}_y$  back to CESM2, we adopted a process-based approach to parameterize  $\text{NH}_3$  emission from cropland soils, which is different from the bidirectional “voltage-resistance” models (Zhu et al., 2015; Riddick et al., 2016; Pleim et al., 2019; Vira et al., 2020). Our approach determines the multi-stage processes of soil  $\text{NH}_4^+$  to  $\text{NH}_3$ , including adsorption, dissociation, and volatilization. The process-based nature of this scheme allows us to evaluate the response of  $\text{NH}_3$  emission to soil climate, soil nitrogen content, fertilization, deposition, competition against other soil biogeochemical processes (nitrification, microbial uptake, etc.), and vegetation growth. Comparing to other approaches, the DNDC scheme requires variables that are mostly already modeled in CLM5, allowing us to largely capture the dynamic nature of  $\text{NH}_3$  emission. We also developed a prognostic parameterization for canopy capture of  $\text{NH}_3$ , instead of using a fixed generic value (e.g., one constant canopy reduction factor for all plants as used in some other studies (e.g., Riddick et al., 2016; Bouwman et al., 1997). Implementing these new schemes in the Community Land Model version (CLM5) (Lawrence et al., 2019), we could then estimate the emission associated with fertilizer use and perform fully coupled simulations with the Community Atmosphere Model version 4 with Chemistry (CAM4-chem) (Lamarque et al., 2012) that allow two-way exchange of  $\text{NH}_y$  bridged by online emission and deposition to understand the subsequent effects on aerosol formation, climate, terrestrial ecosystems, and crop growth. We also compared our results with available emission inventories to evaluate model accuracy and uncertainty. This paper demonstrates a framework to unfold the complicated interactions between fertilizer use,  $\text{NH}_3$  emission, aerosol formation, climate, terrestrial ecosystems, and crop production.

## 2. Methods

### 2.1 Community Earth System Model

We introduced new functionalities into CESM2 to enable the simulation of a coupled land-atmosphere nitrogen cycle, and to further investigate the impacts of fertilizer-induced  $\text{NH}_3$  emission on atmospheric composition, terrestrial biogeochemistry, and climate change. In particular, we implemented into CLM5 new parameterization schemes to quantify  $\text{NH}_3$  volatilized from soil due to fertilizer application and captured by plant canopies. We further

bridged CLM5 and CAM4-chem to enable two-way exchange of soil  $\text{NH}_3$  emission and deposition of  $\text{NH}_4^+$  to model a fully coupled, prognostic land-atmospheric  $\text{NH}_y$  cycle.

Our model development was based on CLM5 with active biogeochemical cycles and crop sub-model (CLM5-BGC-Crop or CLM5 in short), which represents terrestrial carbon and nitrogen cycling with prognostic vegetation and crop growth. The model uses a sub-grid hierarchy (from grid cells, land units, columns, to patches) to capture the biogeophysical and biogeochemical differences between various land types within a model grid cell. In particular, CLM5 handles natural soil and croplands differently: multiple natural vegetation patches are configured to occupy a single unmanaged soil column sharing a single pool of nutrients while each crop patch has a dedicated column. Such setting allows no resource competition between natural vegetation and crops, nor among crops (Drewniak et al., 2013). There are 16 types of natural vegetation (including bare ground) and eight active crops (temperate soybean, tropical soybean, temperate corn, tropical corn, spring wheat, cotton, rice, and sugarcane) in this model (Lombardozzi et al., 2020). Vegetation and crops are represented by plant functional types (PFTs), each having specific ecophysiological, phenological and biogeochemical parameters (Levis et al., 2018). Default PFT distribution of natural vegetation and crops are derived from satellite observations (e.g., MODIS) and agricultural census data (Lawrence and Chase, 2007; Portmann et al., 2010). The beginning of plant growth stages (seedling, leaf emerging, and grain filling), as well as crop sowing dates and planting durations, are controlled by cumulative warm-enough hours at the beginning of spring. Crops obtain nutrients from the soil mineral nitrogen pool, which is supplied by nitrogen deposition and fertilization. Fertilizer is applied to each patch for 20 consecutive days evenly when the crops enter the leaf emergence phase. Synthetic fertilizer input was prescribed by crop type and country at the 2000-level based on Land-Use Harmonization (LUH2) fertilization rates (Hurtt et al., 2011). Manure fertilizer application rate is assumed constant for all crops at  $2 \text{ g-N s}^{-1}$ , same as the model default (Lombardozzi et al., 2020). All added depositional and fertilizers N are added to the soil  $\text{NH}_4^+$  pool of each layer from ground surface to 0.4 m underground according to a model-defined soil profile (**Table S1**). Crops are harvested once they reach maturity or predefined maximum growing days (typically 150–165 days) (Lawrence et al., 2020).

In addition to the  $\text{NH}_3$  schemes, we also modified CLM5 to better simulate the terrestrial nitrogen cycle, specifically on the emission of  $\text{NO}_x$  from denitrification and

nitrification and microbial mineralization of soil nitrogen. These modifications are documented in **Supplementary Information**.

190

## 2.2 Soil ammonia emission and canopy capture

**Figure 1** summarizes the primary pathways of the terrestrial nitrogen cycle in CLM5. The model tracks nitrogen content in soil, plant, and organic matter as an array of separate nitrogen pools, and biogeochemical processes as exchange fluxes of nitrogen between these pools. Soil mineral nitrogen,  $\text{NH}_4^+$ , and  $\text{NO}_3^-$  are competed for among plant uptake, microbial immobilization, nitrification, and denitrification, based on the relative demand from each process. Release of nitrous oxide ( $\text{N}_2\text{O}$ ) and  $\text{NO}_x$  as byproducts of nitrification and denitrification and leaching of soil nitrate also deplete soil  $\text{NH}_4^+$  and  $\text{NO}_3^-$ , which can be replenished by fertilization and deposition of atmospheric  $\text{NH}_y$  and  $\text{NO}_x$ . The deposition rates were prescribed in the default configuration and dynamically computed by CAM4-chem in our version. Other sources of soil mineral nitrogen include biological fixation by microbes or soybean and decomposition of plant litter and soil organic matter. Our proposed  $\text{NH}_3$  emission scheme was borrowed from a standalone biogeochemical model, the DeNitrification-DeComposition (DNDC) model version 9.5 (Li et al., 2012; Gilhespy et al., 2014; source code of DNDC v9.5 provided by Changsheng Li via personal communication on Jun 18<sup>th</sup>, 2015), which has been extensively used for studying agricultural  $\text{NH}_3$  emission (e.g., Li et al., 2012; Balasubramanian et al., 2015; Zhang and Niu, 2016; Balasubramanian et al., 2017).

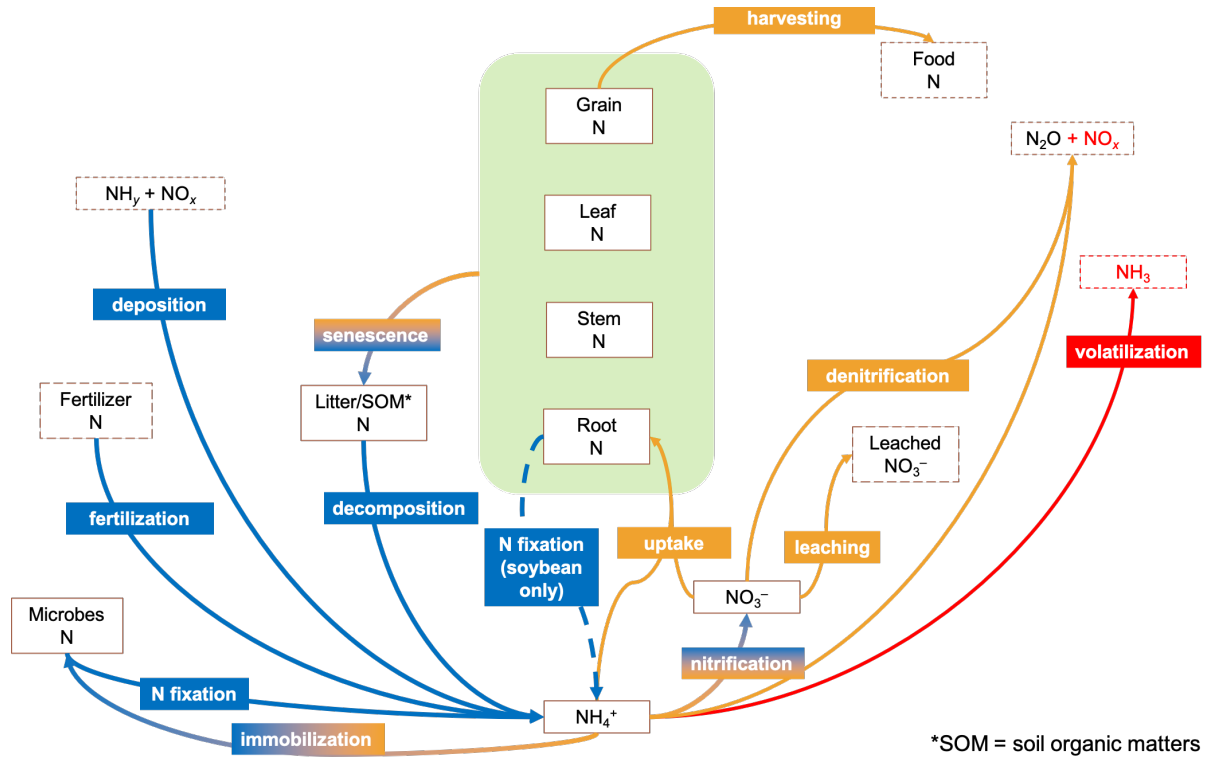

**Figure 1.** Major pathways modeled by CLM5 nitrogen (N) cycle. Blue arrows indicate N entering the soil N nitrogen pool while orange arrows are for leaving. The default model tracks only N pools in boxes enclosed by solid lines, but not those with dashed lines. N contents in crop tissues are modeled as pools inside the green regions. The red arrow indicates the missing pathway of  $\text{NH}_3$  volatilization in the default model. Nitrogen gas ( $\text{N}_2$ ) emitted by denitrification is not shown. SOM denotes soil organic matters.

Following the treatment in DNDC, our scheme considered  $\text{NH}_3$  volatilization a multistage process, and estimated the potential soil  $\text{NH}_3$  prone to emission ( $F_{\text{soil,pot}}$ ;  $\text{g-N m}^{-3}$ ) based on soil  $\text{NH}_4^+$  content. In each soil layer of a column or patch:

$$F_{\text{soil,pot}} = [\text{NH}_4^+_{(\text{soil})}](1 - f_{\text{ads}})f_{\text{dis}}f_{\text{vol}} \quad (1)$$

where  $[\text{NH}_4^+_{(\text{soil})}]$  ( $\text{g-N m}^{-3}$ ) is the amount of soil  $\text{NH}_4^+$ ;  $f_{\text{ads}}$  accounts for the portion of  $\text{NH}_4^+$  adsorbed onto the surface of soil matrix;  $f_{\text{dis}}$  is the fraction of the non-adsorbed  $\text{NH}_4^+$  that dissociated into aqueous  $\text{NH}_3$ , and;  $f_{\text{vol}}$  is the fraction of aqueous  $\text{NH}_3$  volatilized as gaseous  $\text{NH}_3$ . The adsorbed fraction  $f_{\text{ads}}$ , which is also bounded between 0 and 1, is given by Li et al., 1992 and Dutta et al., (2016):

$$f_{\text{ads}} = 0.99(7.2733f_{\text{clay}}^3 - 11.22f_{\text{clay}}^2 + 5.7198f_{\text{clay}} + 0.0263) \quad (2)$$



225 where  $f_{\text{clay}}$  is soil clay fraction as prescribed by the CLM surface data (Bonan et al., 2002); we adopted a factor of 0.99 instead of the one reported in Dutta et al. (2016), as per the source code of DNDC.

The non-adsorbed  $\text{NH}_4^+$  dissociates reversibly into aqueous  $\text{NH}_3$  and hydrogen ion ( $\text{NH}_4^+(\text{aq}) \rightleftharpoons \text{NH}_3(\text{aq}) + \text{H}^+$ ), and hence,  $f_{\text{dis}}$  is determined by the following equations (Li et al., 230 2012; Sutton, 1990; Sutton et al., 1993):

$$f_{\text{dis}} = \frac{K_w}{K_a[\text{H}^+]} \quad (3)$$

$$K_w = 10^{0.08946+0.03605[^\circ\text{C}^{-1}]T_{\text{soil}}} \times 10^{-15} \quad (4)$$

$$K_a = (1.416 + 0.01357[^\circ\text{C}^{-1}]T_{\text{soil}}) \times 10^{-5} \quad (5)$$

$$[\text{H}^+] = 10^{-\text{pH}} \quad (6)$$

235 where  $K_a$  ( $\text{mol L}^{-1}$ ) and  $K_w$  ( $\text{mol L}^{-2}$ ) are dissociation constants for  $\text{NH}_4^+/\text{NH}_3$  and hydrogen-/hydroxide-ion equilibria, respectively;  $T_{\text{soil}}$  ( $^\circ\text{C}$ ) is soil temperature;  $[\text{H}^+]$  ( $\text{mol}$ ) is the concentration of aqueous hydrogen ion in the soil calculated from soil pH. CLM5 is currently not capable of calculating soil pH implicitly so we performed our simulations using a constant pH of 6.5 for a more focused analysis. This pH value is consistent with the value used in the nitrification and denitrification schemes in CLM5. We further evaluated the uncertainty 240 induced by our choice of pH and presented the sensitivity test results in **Supplementary Information**.

Lastly, our scheme assumes that vaporized soil  $\text{NH}_3$  in a deeper layer diffuse upward to the surface, but does not explicitly simulates the process. Instead, it is represented in the last 245 term in **Eq. (7)** as a ratio of  $(l_{\text{max}} - l)/l$  for the  $\text{NH}_3(\text{g})$  contained in each soil layer. Hence, soil  $\text{NH}_4^+$  in deeper layers is also subject to loss to  $\text{NH}_3$  volatilization but at much slower rates than that in the upper layers.

We used this equation to calculate  $f_{\text{vol}}$  (Li et al., 1992; Gardner, 1965; source code of DNDC v9.5):

$$250 \quad f_{\text{vol}} = \left( \frac{1.5s}{1 [\text{m s}^{-1}] + s} \right) \left( \frac{T_{\text{soil}}}{50 [^\circ\text{C}] + T_{\text{soil}}} \right) \left( \frac{l_{\text{max}} - l}{l_{\text{max}}} \right) \quad (7)$$

where  $s$  ( $\text{m s}^{-1}$ ) is surface wind speed;  $T_{\text{soil}}$  ( $^{\circ}\text{C}$ ) is soil temperature;  $l$  and  $l_{\text{max}}$  (both in m) are the depth of each soil layer and the maximum depth of a soil column, respectively. Details of the soil profile are provided in **Table S1**. The actual soil  $\text{NH}_3$  to be emitted ( $F_{\text{soil,act}}$ ;  $\text{g-N m}^{-3}$ ) from each soil layer is then determined by the lower of the  $F_{\text{soil,pot}}$  or the available soil  $\text{NH}_4^+$  after competition with other processes, namely, plant uptake, microbial immobilization, and nitrification. The model distributes available soil  $\text{NH}_4^+$  to all competing processes according to their relative demands (individual potential flux to sum of all four potential fluxes) without bias toward any process (Lawrence et al., 2019). The column-level actual soil  $\text{NH}_3$  emission flux ( $F_{\text{soil}}$ ;  $\text{g-N m}^{-2} \text{s}^{-1}$ ) is computed as the sum of the product of the  $F_{\text{soil,act}}$  and layer thickness (m) at each layer, and assumed to emit to the atmosphere constantly over a model time step size ( $\Delta t = 1800$  s in this study).

If vegetation is present above the soil, some of the emitted  $\text{NH}_3$  can be retained by the plant canopy, which is known to be related to the adsorption of hydrophilic  $\text{NH}_3$  onto the leaf surface and molecular diffusion via the leaf stomata (Van Hove et al., 1987). Some studies represented the amount of captured  $\text{NH}_3$  using constant scaling factors (e.g., 0.6 for all vegetation in Riddick et al. (2016), 0.8, 0.5, and 0.2 for tropical rainforests, other forests, and all other vegetation types, respectively, in Bouwman et al. (1997)). Here, we calculated the flux of  $\text{NH}_3$  captured by canopy following the equation used in DNDC that accounts for the change in in-canopy  $\text{NH}_3$  concentration, deposition velocity of ammonia, leaf area index (LAI), and air moisture (Institute for the Study of Earth, Oceans, and Space, University of New Hampshire, 2017). To include the dynamic growth of crop canopy, we further adopted the canopy height adjustment factor employed by the Community Multiscale Air Quality (CMAQ) regional chemical transport model (Pleim et al., 2013). The portion of  $\text{NH}_3$  flux from the soil that is not captured by plant canopies ( $F_{\text{atm}}$ ;  $\text{g-N m}^{-2} \text{s}^{-1}$ ) is thus:

$$F_{\text{atm}} = F_{\text{soil}}(1 - f_{\text{can}}) \quad (8)$$

$$f_{\text{can}} = \frac{L}{s_{10}} v_c \phi_c b (h_{\text{top}} - h_{\text{bot}}) \quad (9)$$

where  $L$  is one-sided snow-free LAI,  $s_{10}$  is the wind-speed ( $\text{m s}^{-1}$ ) at 10-m height,  $v_c$  is the deposition velocity of  $\text{NH}_3$  ( $0.05 \text{ m s}^{-1}$  as in DNDC),  $\phi_c$  is in-canopy relative humidity,  $b$  is a correction factor for the effect of canopy thickness ( $14 \text{ m}^{-1}$  is used here as suggested by Pleim et al. (2013)), and  $h_{\text{top}}$  and  $h_{\text{bot}}$  are heights of canopy top and bottom (both in m), respectively.

Except for  $v_c$  and  $b$ , all variables are calculated within CLM5 (see Lawrence et al. (2019) for detailed calculation methods). These two equations estimate the concentration of  $\text{NH}_3$  exposed to plant canopy under a given soil emission rate at each time step: dividing soil  $\text{NH}_3$  emission rate by  $s_{10}$  gives an approximate in-canopy  $\text{NH}_3$  concentration, and multiplying the latter with  $v_c$  and  $L$  produces an estimated quantity of  $\text{NH}_3$  retained by the canopy. The last three terms account for the influence of in-canopy moisture and canopy thickness on the effectiveness of canopy capturing. We used  $F_{\text{atm}}$  as an input of the ammonia emissions to drive chemistry calculations in CAM4-chem. The captured  $\text{NH}_3$  can re-enter the soil surface along with water throughfall or be metabolized by the plants if it diffuses into the leaf tissues (Hutchinson et al., 1972). Since the detailed mechanisms are still uncertain and beyond the focus of this study, we decided to assume that all captured  $\text{NH}_3$  returns to the soil directly as  $\text{NH}_4^+$  and will discuss how it will affect our analysis in **Conclusions**.

### 2.3 Simulations of the land-atmosphere $\text{NH}_y$ cycle

For the atmospheric component, we employed CAM4-chem (Lamarque et al., 2012), with chemistry based on the tropospheric chemistry mechanism of MOZART-4 (Emmons et al., 2010). CAM4-chem employs a bulk aerosol approach and predicts the formation of  $\text{PM}_{2.5}$  components including  $\text{SO}_4^{2-}$ ,  $\text{NO}_3^-$ , and  $\text{NH}_4^+$ , where the injection rates of precursors – sulfur dioxide ( $\text{SO}_2$ ),  $\text{NO}_x$ , and  $\text{NH}_3$  – are prescribed by the Coupled Model Intercomparison Project phase 6 (CMIP6)/Community Emissions Data System (CEDS) emission inventory (CMIP6 hereinafter) for anthropogenic activities as well as biomass burning in the default configuration (Hoesly et al., 2018b). Biogenic emissions, e.g., of isoprene, are updated online from CLM5 using the Model of Emissions of Gases and Aerosols from Nature (MEGAN) version 2.1 (Guenther et al., 2012). In our coupled simulations, we substituted the portion of  $\text{NH}_3$  emission associated with synthetic fertilizer from the CAM4-chem inventory input (CESD) for our online simulated emission rates from CLM5. Atmospheric  $\text{NH}_3$  and  $\text{NH}_4^+$  formed sequentially return to CLM5 through deposition.

Dry deposition in CAM4-chem is handled using the resistance approach (Wesely, 1989; Emmons et al., 2010). For  $\text{NH}_3$  vapor, the model calculates the aerodynamic and the boundary-layer (laminar sublayer) resistance based on the online atmospheric dynamics, while the

surface resistance over land is determined according to the online CLM5 surface variables, e.g., canopy height and LAI, as well as species-specific reactivity factor for oxidation and effective Henry's Law coefficients. For particle-phase  $\text{NH}_4^+$ , the aerodynamic resistance is the same as that of  $\text{NH}_3$ , but the boundary-layer and surface resistances are replaced by a single resistance term that depends on the surface friction velocity. The deposition velocities of  $\text{NH}_3$  and  $\text{NH}_4^+$  are the reciprocal of the sum of their corresponding resistance terms, and their deposition rates are the product of their deposition velocities and concentrations. Wet deposition in CAM4-chem follows the Neu and Prather (2012) scheme, which assumes a first-order loss of chemicals due to in-cloud and below-cloud scavenging processes. The wet deposition rates of  $\text{NH}_3$  and  $\text{NH}_4^+$  are the products of their concentration, their loss frequencies (based on their Henry's Law coefficients), and the fraction of the grid box subject to scavenging (e.g., cloudy or raining). These  $\text{NH}_y$  deposition fluxes (together with  $\text{NO}_x$ ) then become the input to CLM5 for the soil  $\text{NH}_4^+$  pool (Lawrence et al., 2020).

Atmospheric reactive nitrogen does not directly interact with radiative transfer in CAM4-chem. Instead, its radiative implications are manifested in the radiative effect of any changes in sulfate formation (direct) and the subsequent sulfate-induced changes in cloud optical properties (indirect). Detailed description of the radiative transfer processes in CAM4-chem is provided in Lamarque et al. (2012) and the model manual (CAM Reference Manual, 2021).

Recent studies on  $\text{NH}_3$  emission using CESM2 (e.g., Riddick et al. (2016) and Vira et al. (2020)) focused only on the one-way land-to-atmosphere flux of  $\text{NH}_3$  while neglecting the enhancing effect of nitrogen deposition on  $\text{NH}_3$  emission. By coupling CLM5 and CAM4-chem, we allowed, for the first time, the model land-atmosphere  $\text{NH}_y$  cycle to evolve in response to any changes in the bidirectional exchange of  $\text{NH}_3$  and  $\text{NH}_4^+$  via online emission and deposition. It also makes our method more suitable than a one-way model for studying the feedback effects of future changes in climate and agricultural activities on the biogeochemical cycles.

**Table 1** provides configuration details of our experiments. All simulations were run for 30 years using the spun-up year-2000 initial conditions with the corresponding land cover data provided out-of-the-box by CLM5. The first 10 years of outputs were used to further stabilize the model (such that the change in annual emission fluxes  $< \pm 10\%$ ) after our ammonia scheme

was implemented. Our analysis in the next section focuses on the averages of the last 20 years of simulated results to minimize influence from any long-term meteorological variability. Only the atmosphere (CAM4-chem) and the land (CLM5) components were active. CAM4-chem was run with free dynamics in the standard spatial resolution of 1.9° by 2.5° horizontally with 27 vertical layers (from surface to ~40 km). CLM5 was run in the same horizontal resolution with 25 soil layers down to ~50 m below ground. Sea surface temperature (SST) and sea ice conditions (Hurrell et al., 2008), as well as the mixing ratios of greenhouse gases (Meinshausen et al., 2017) were all fixed at the 2000-levels. Our analysis focuses on the changes in fluxes of soil biogeochemical processes, the evolution of atmospheric NH<sub>3</sub>, NH<sub>4</sub><sup>+</sup>, and other SNA aerosols, and the influence of the bidirectional NH<sub>y</sub> exchange on crop production. We further evaluated the impacts of intensive fertilizer use to promote agricultural production in the future as projected by FAO (FAO, 2007) by repeating the first three simulations with fertilization at present-day (2000; model default) and future (2050; assuming 30% more synthetic fertilizers while manure fertilizer is kept at 2000-level) rates. We note that future increases in agricultural production might also involve cropland expansion, but such practice was not included in this study.

**Table 1.** Details of simulation designs.

| Alias               | Synthetic Fertilizer Usage | Fertilizer-induced NH <sub>3</sub> Emission | N-deposition                                       | Aerosol-radiation Interaction |
|---------------------|----------------------------|---------------------------------------------|----------------------------------------------------|-------------------------------|
| CAM4_CLM5_2000      | Same as 2000-level         | Modified CLM5 in this study                 | Dynamic                                            | Enabled                       |
| CAM4_CLM5_2050      | 30% more than 2000-level   | Modified CLM5 in this study                 | Dynamic                                            | Enabled                       |
| CAM4_CLM5_NDEP_2000 | Same as 2000-level         | Modified CLM5 in this study                 | Dynamic                                            | Disabled                      |
| CAM4_CLM5_NDEP_2050 | 30% more than 2000-level   | Modified CLM5 in this study                 | Dynamic                                            | Disabled                      |
| CAM4_CLM5_CLIM_2000 | Same as 2000-level         | Modified CLM5 in this study                 | From [CAM4_CLM5] assuming 2000-level fertilization | Enabled                       |
| CAM4_CLM5_CLIM_2050 | 30% more than 2000-level   | Modified CLM5 in this study                 | From [CAM4_CLM5] assuming 2000-level fertilization | Enabled                       |
| CAM4_CMIP6_2000     | Same as 2000-level         | CMIP6 inventory                             | Dynamic                                            | Enabled                       |

## 2.4 Datasets for model validation

We also compared our simulation results with various available global observations and emission inventories. CLM5-modeled  $\text{NH}_3$  emission was compared with multiple emission inventories including CMIP6, EDGAR, and the Magnitude And Seasonality of Agricultural Emissions for  $\text{NH}_3$  (MASAGE). CAM4-chem-simulated atmospheric  $\text{NH}_3$  using CLM5  $\text{NH}_3$  and CMIP6 were compared against the satellite-derived IASI- $\text{NH}_3$  concentration field (gridded and reported in Van Damme et al. (2018)). Details of these datasets are tabulated in **Table 2**. The datasets were regridded to match our model resolution of  $1.9^\circ$  by  $2.5^\circ$  using bilinear interpolation. We note also that model-inventory comparisons are not meant to be exact given that our simulations were performed using free-running dynamics and thus did not necessarily match the meteorological years of the inventories, and the synthetic fertilizer use was not identical to the ones assumed when inventories were compiled. Thus, these results are presented as qualitative comparisons to indicate where our estimation is consistent with the inventories and where it is not.

**Table 2.** Details of observations and emission inventories used in this study for model comparison and validation.

| Name                             | Coverage | Resolution                                     | Period of data | Data type: sources extracted for model comparison                                                                 |
|----------------------------------|----------|------------------------------------------------|----------------|-------------------------------------------------------------------------------------------------------------------|
| MASAGE<br>(Paulot et al., 2014)  | Global   | $0.5^\circ$ -by- $0.5^\circ$<br>Monthly mean   | 2006           | Emission inventory: $\text{NH}_3$ emission from agricultural soil associated with synthetic fertilizers for crops |
| EDGAR<br>(Crippa et al., 2018)   | Global   | $0.1^\circ$ -by- $0.1^\circ$<br>Monthly mean   | 2010           | Emission inventory: $\text{NH}_3$ emission from agricultural soil with fertilizer and manure application          |
| CMIP6<br>(Hoesly et al., 2018b)  | Global   | $0.01^\circ$ -by- $0.01^\circ$<br>Monthly mean | 2006–2015      | Emission inventory: $\text{NH}_3$ emission from agricultural soil with fertilizer and manure application          |
| IASI<br>(Van Damme et al., 2018) | Global   | $0.01^\circ$ -by- $0.01^\circ$<br>Annual mean  | 2008–2016      | Satellite-based measurement:<br>Column $\text{NH}_3$ density                                                      |

### 3. Results

#### 3.1 Fertilizer-induced NH<sub>3</sub> emission

We first evaluated the fertilizer-induced NH<sub>3</sub> emission simulated by the fully coupled land-atmosphere simulation, [CAM4\_CLM5\_2000]. **Figure 2** shows the annual-total global NH<sub>3</sub> emission at above-canopy level from different land types averaged over the remaining 20 years of simulation. We also compared our NH<sub>3</sub> emission with inventory estimates reported by CMIP6 (Hoesly et al., 2018b), EDGAR v4.3.2 (Crippa et al., 2018), and MASAGE (Paulot et al., 2014). We extracted the monthly fertilizer-induced NH<sub>3</sub> emission estimates from MASAGE, and assumed that one-third of the total agricultural NH<sub>3</sub> emission reported by CMIP6 and EDGAR are fertilizer-associated, which is consistent with the apportionment reported in previous studies and environmental reports (Paulot et al., 2014; Riddick et al., 2016; National Oceanic and Atmospheric Administration, 2000; European Environment Agency, 2010; Gu et al., 2012; Paulot et al., 2015; Zheng et al., 2017).

Regional emission totals are summarized in **Table 3**. A grid cell-by-grid cell model-inventory spatial comparison of the annual-total NH<sub>3</sub> emission rates was conducted by computing Pearson's correlation coefficients ( $R$ ) and slopes ( $\beta$ ) of linear regression using the reduced major axis method as well as normalized mean biases (NMB;  $\Sigma(M_i - O_i)/\Sigma(O_i)$ , where  $M_i$  and  $O_i$  are simulated and inventory NH<sub>3</sub> emission in each grid cell) and mean fractional biases (MFB;  $2\Sigma[(M_i - O_i)/(M_i + O_i)]/N$ , where  $N$  is the number of grid cell). A summary of these statistics is shown in **Figure 2(a)**. We also computed the  $R$  values between the monthly emission rates computed by CLM5 (as in the fully coupled case, [CAM4\_CLM5\_2000]) and each inventory for each grid cell (see **Figure 2(d), (f), and (h)**). We highlighted with overlaying black dots the grid cells with high coefficients of determination, which are statistically significant (i.e.,  $R^2 > 0.5$  and  $p < 0.05$ ), indicating where our simulation can reproduce more than half of the variability of the inventory estimates.

**Table 3.** Regional fertilizer-induced  $\text{NH}_3$  emission totals estimated by our model and other inventories.

|                       | Global | USA | Europe | India | China |
|-----------------------|--------|-----|--------|-------|-------|
| <b>CAM4_CLM5_2000</b> | 14.2   | 2.1 | 0.6    | 2.8   | 1.2   |
| <b>CMIP6</b>          | 10.9   | 0.9 | 0.7    | 1.9   | 2.6   |
| <b>EDGAR</b>          | 10.5   | 0.7 | 0.5    | 1.6   | 3.0   |
| <b>MASAGE</b>         | 9.1    | 0.5 | 0.4    | 1.7   | 2.8   |

Globally, CLM5 estimates that the annual-total fertilizer-induced  $\text{NH}_3$  emission reaches 14  $\text{Tg-N yr}^{-1}$  while the global fertilizer input is 96  $\text{Tg-N yr}^{-1}$  (of which 71% is synthetic fertilizers). Our estimation is close to the 12  $\text{Tg-N yr}^{-1}$  (from synthetic fertilizer only) and 18  $\text{Tg-N yr}^{-1}$  (from both synthetic and manure fertilizer) reported by two similar studies, Riddick et al. (2016) and Vira et al. (2020), respectively. Our estimate is higher than all three inventories, which are 10  $\text{Tg-N yr}^{-1}$  for CMIP6 and EDGAR, and 9.1  $\text{Tg-N yr}^{-1}$  for MASAGE. The global  $R$  values are positive and lie within 0.4–0.6 across all inventories, indicating a fairly good correlation between CLM5 and all three inventories, especially CMIP6 and MASAGE. Systematic model high-biases are implied by the greater-than-unity  $\beta$  values, with small NMB and MFB values ranging between +32~+56% and -22~+32%, respectively.

Top food-producing countries are responsible for a major portion of the fertilizer-induced  $\text{NH}_3$  emission: 20 % of CLM5 global total was from India (2.8  $\text{Tg-N yr}^{-1}$ ), 15 % from the US (2.1  $\text{Tg-N yr}^{-1}$ ), and 8.6% from China (1.2  $\text{Tg-N yr}^{-1}$ ). Emission hotspots are found close to their cropping regions in the model and the inventories, but their spatial gradients are different. In India, CLM5 shows more concentrated emission sources over the northern regions, resulting in higher local emission rates than the inventories. This distribution pattern resembles the India's north-higher south-lower fertilization gradient adopted by the model. In contrast, CMIP6 estimates a more evenly distributed emission spatial pattern over India, and higher emission rates over the southern regions. EDGAR and MASAGE show a spatial gradient of  $\text{NH}_3$  emission decreasing from north to south. Such gradients may explain their low  $R$  and high  $\beta$  values against our revised CLM5. Despite the spatial mismatch, the NMB (+68~+74%) and MFB (+14~+15%) for the model estimation over India are relatively small.



CLM5 estimates more intense emission hotspots in the US, which are located near the  
425 “Corn Belt” of the central US and southern California. US emission rates by CLM5 are much  
higher than the other three inventories, as seen in the difference maps in **Figure 2**, as indicated  
by the large  $\beta$  ( $>3.2$ ), and large regional NMB. Differences in the spatial distribution of  $\text{NH}_3$   
emission are also observed over China. CLM5 estimates that more  $\text{NH}_3$  is emitted from central  
and northeastern China, while the emission hotspots in CMIP6 and EDGAR are found in  
430 northeastern China and those of MASAGE are in eastern China. Such deviation may be  
attributable to different fertilizer usage schedules used by CLM5 and other inventories. For  
example, MASAGE considers multiple-type fertilizers that can be more or less prone to  $\text{NH}_3$   
loss than urea (Bouwman et al., 2002), and assumes a three-stage fertilization at sowing, growth,  
and harvesting (Paulot et al., 2014). EDGAR also reported a high uncertainty ( $\sim 97\%$ ) of  
435 present-day  $\text{NH}_3$  emissions in China due to incomplete information about the agricultural  
sector (Crippa et al., 2018).

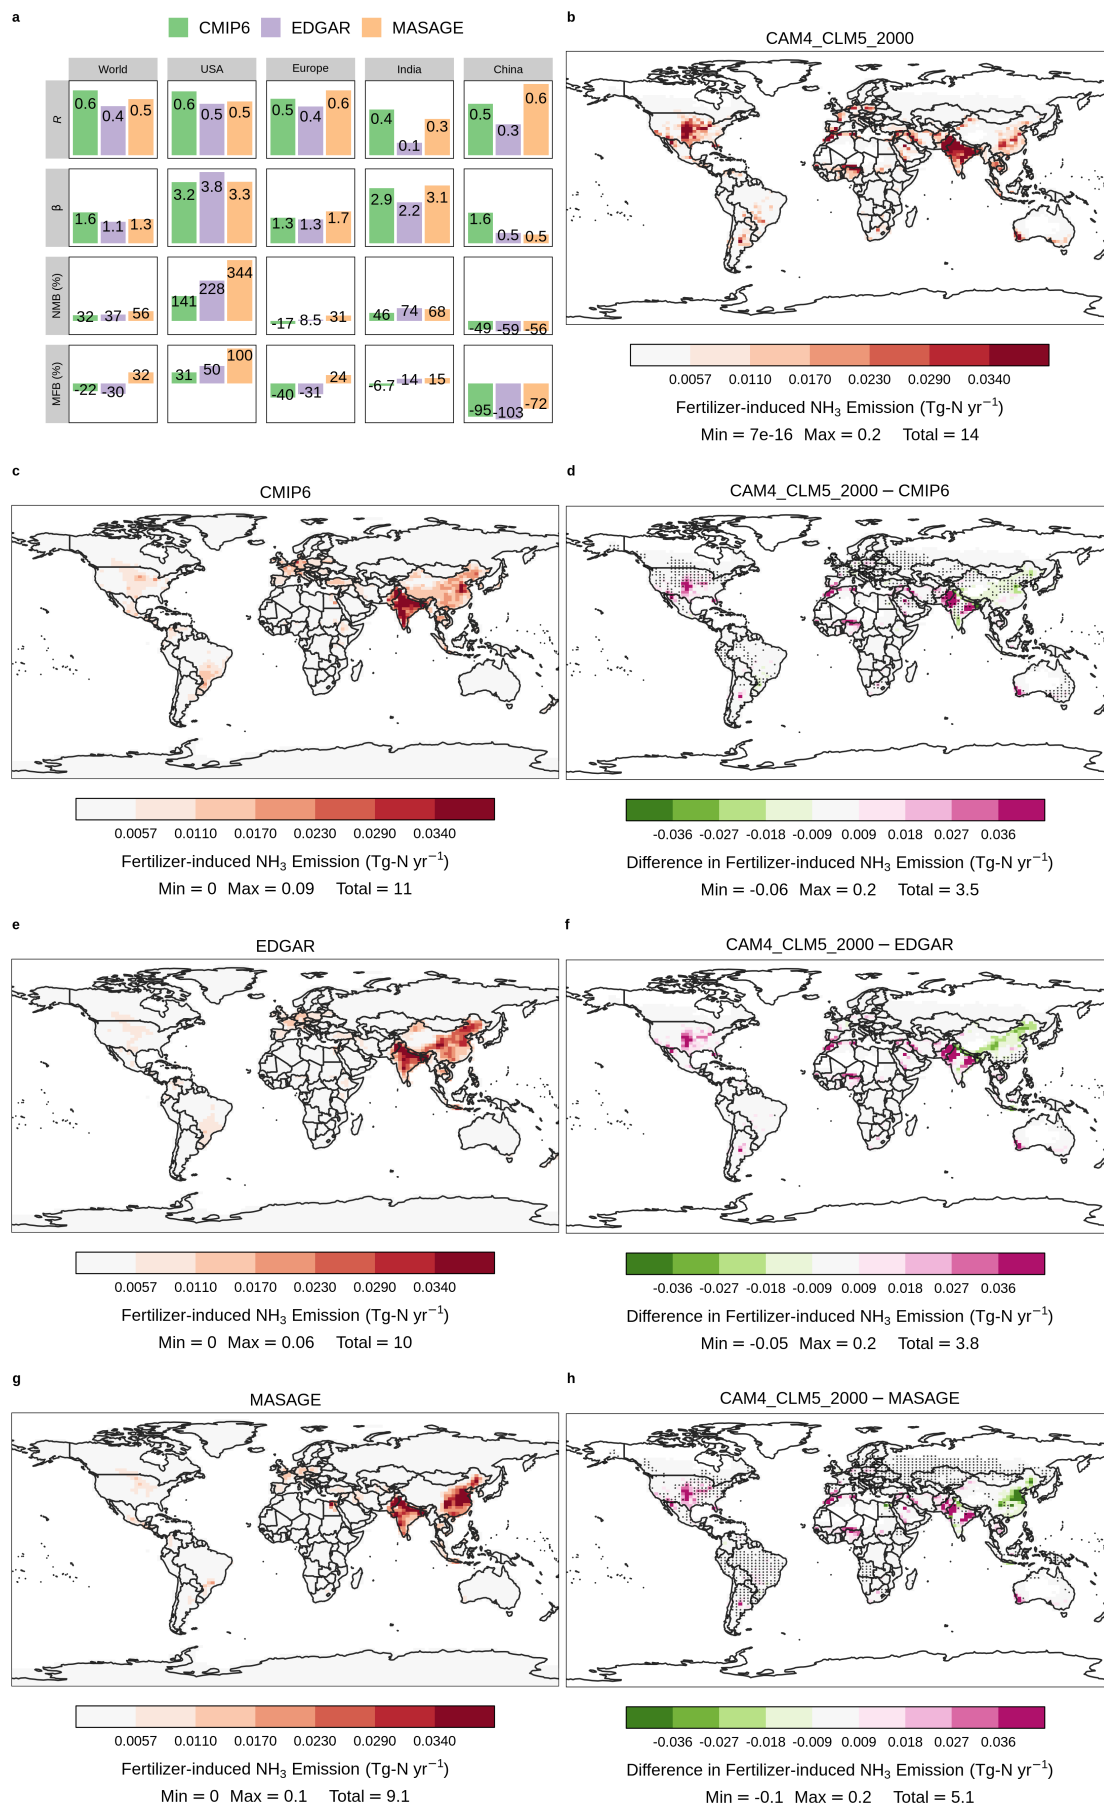

**Figure 2.** Fertilizer-induced NH<sub>3</sub> emission estimated by CLM5 and other emission inventories. Correlation analysis between CLM5-simulated annual-total emission and other inventories with regional breakdowns is summarized in panel (a). Spatial distribution of annual-total fertilizer-induced NH<sub>3</sub> emission simulated by [CAM4\_CLM5\_2000], and estimated by CMIP6, EDGAR, and MASAGE are illustrated in panels (b), (c), (e), and (g), respectively. Panels (d), (f), and (h) show the spatial distribution of differences in annual-total NH<sub>3</sub> between CLM5 and CMIP6, EDGAR, and MASAGE, correspondingly. Overlaying black dots in the difference maps indicate grid-cells with a high statistically significant spatiotemporal correlation (i.e.,  $R^2 > 50\%$ ,  $p < 0.05$ ) between CLM5 and the corresponding inventories. Color scales are saturated at respective values, and ranges of values are shown in the legend titles.

**Figure 3** shows the seasonality of NH<sub>3</sub> emission associated with artificial fertilizer in the Northern and Southern Hemisphere. CLM5 assumes each crop receives a specific amount of fertilizer (as soil NH<sub>4</sub><sup>+</sup>) applied evenly for 20 consecutive days since leaf emergence. This soil NH<sub>4</sub><sup>+</sup> input speeds up plant uptake, microbial immobilization, nitrification, as well as NH<sub>3</sub> volatilization, explaining the Northern Hemisphere peaking in emission in April and May and Southern Hemisphere peaking in October, overlapping with the regional cropping seasons. All inventories show springtime peaks in each hemisphere, but the peak of EDGAR always leads the others by a month. CMIP6 has multiple peaks (two in the Northern Hemisphere and three in the Southern Hemisphere). These deviations exist mainly because of the differences in planting schedule and duration of fertilization used by the inventories. The higher CLM5 peaks are consistent with the systematic overestimation discussed above. NH<sub>3</sub> emission returns to “background” levels when it is not in the planting seasons. EDGAR and CMIP6 have higher background levels than MASAGE because the original estimates accounted for not only synthetic fertilizer but also manure application (for both) and management (for CMIP6 only), which are not necessarily in phase with the cropping seasons (Huijsmans et al., 2018).

We concluded our model-inventory comparison by computing the correlation of monthly NH<sub>3</sub> emission rates in each model grid cell (see **Figure 2(d), (f), and (h)**). CLM5 can capture a large portion of emission hotspots of CMIP6 over the US, Europe, India, China, and South America. With MASAGE, our estimate shows good agreement over mid-range emission regions, in North America, South America, Europe, and Southern Africa. CLM5 differs the most from EDGAR among the three inventories. The resemblance with CMIP6 and MASAGE indicates that our NH<sub>3</sub> scheme has allowed CLM5 to produce reasonable NH<sub>3</sub> emission inputs

for CAM4-chem simulations over most high to medium emission hotspots. It is also noteworthy that the magnitude and spatial distribution of  $\text{NH}_3$  emission among inventories are also not consistent. Since environmental conditions control the rate of biological and chemical processes that release  $\text{NH}_3$ , processes such as urea hydrolysis and  $\text{NH}_4^+/\text{NH}_3$  equilibrium can induce further inventory uncertainties (Hoesly et al., 2018b). Inter-inventory uncertainties are also attributable to the choice of global and/or regional emission factors, which is crucial to reflect different agricultural procedures across the world, such as fertilization methods and fertilizer types, but not always well represented in global inventories (Paulot and Jacob, 2014; Riddick et al., 2016; Zhang et al., 2018).

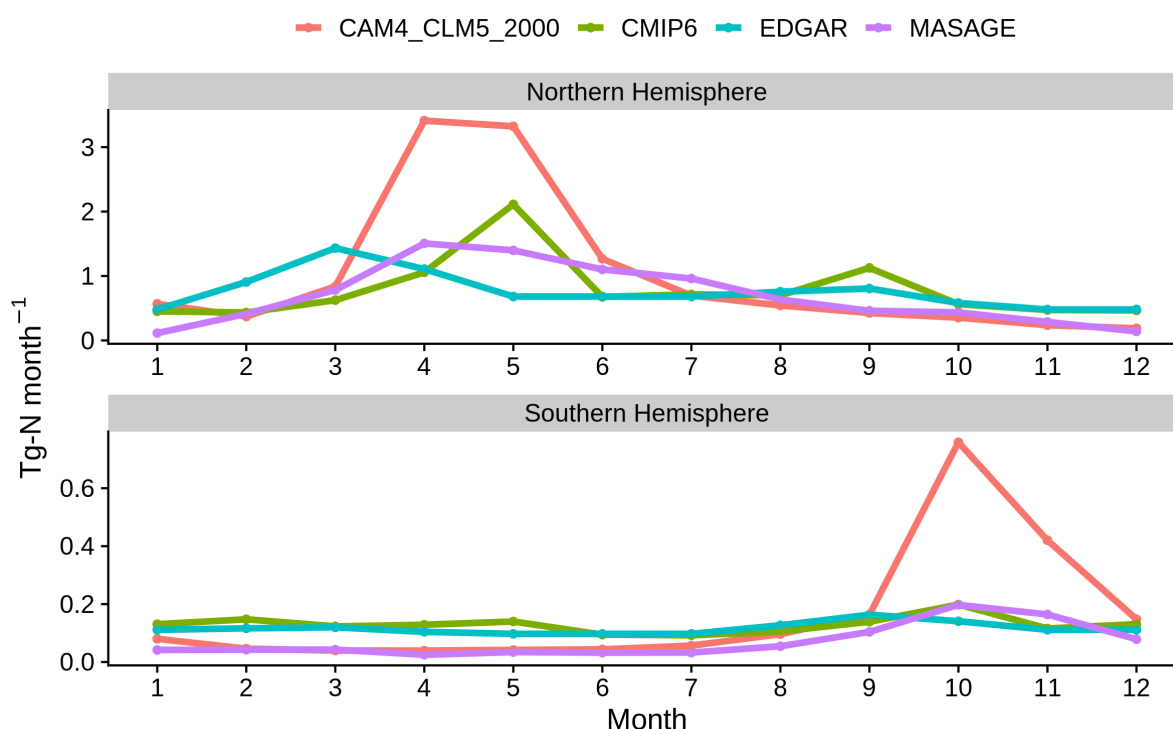

**Figure 3.** Monthly  $\text{NH}_3$  emission associated with synthetic fertilizer use in the Northern and South Hemisphere estimated by CLM5, CMIP6, EDGAR, and MASAGE.

### 3.2 Atmospheric $\text{NH}_3$ concentration

Previous studies have evaluated the reactive nitrogen processes in CESM against satellite and ground observations, e.g., depositional fluxes of  $\text{NH}_3$  and  $\text{NH}_4^+$  (Lamarque et al., 2013), and

ground concentration of gaseous  $\text{NH}_3$  (He et al., 2015). Here, we estimated the CAM4-chem simulated annual-mean atmospheric  $\text{NH}_3$  using two different sets of fertilizer-induced emissions: 1) simulated by our revised CLM5 ([CAM4\_CLM5\_2000]), and; 2) one prescribed from CMIP6 ([CAM4\_CMIP6\_2000]). Source of non-fertilizer related  $\text{NH}_3$  and other reactive gases were identical in these two cases. **Figure 4** shows these results, aggregated to column total  $\text{NH}_3$ , alongside the 8-year annual-average IASI satellite retrievals.

Both simulations can capture the high  $\text{NH}_3$  zones observed by IASI over the US, South America, and Europe, with global and regional  $R$  values  $> 0.5$ , indicating a good correlation between the modeled results and observations. However, both [CAM4\_CLM5\_2000] and [CAM4\_CMIP6\_2000]  $\text{NH}_3$  are generally lower than IASI. One except is over India, in which [CAM4\_CLM5\_2000] estimates higher than IASI with a regional  $\beta$  of 3.3. [CAM4\_CLM5\_2000] matches IASI better over the US (regional  $\beta = 0.9$ ), where CLM5 estimates high emission rates. Even more significant underestimation is seen in [CAM4\_CMIP6\_2000] (regional  $\beta = 0.5$ ) over the US. The magnitudes of NMB and MFB of [CAM4\_CLM5\_2000] are less negative than [CAM4\_CMIP6\_2000] in most regions, reflecting that using CLM5 as  $\text{NH}_3$  emission input reduces the model  $\text{NH}_3$  underestimation of CAM4-chem with the default CMIP6 inventory.

Mild differences are seen in North America and northeastern China, which are both intense agricultural regions; the discrepancies are likely attributable to the mismatch in crop growth map between CLM5 and the real world. Larger differences are shown over India and Western Europe, indicating the low-biases in the model of emission from tropical biomass burning regions (Whitburn et al., 2017; Van Damme et al., 2018).

We further compared the  $\text{NH}_3$  burden of a run with online  $\text{NH}_3$  emission but prescribed N deposition, i.e., [CAM4\_CLM5\_CLIM\_2000], against IASI to examine whether enabling the online bidirectional exchange can improve the estimation of  $\text{NH}_3$  in CLM5. The global-total  $\text{NH}_3$  emission increases by 0.45% by enabling dynamic nitrogen deposition raised ([CAM4\_CLM5\_2000]–[CAM4\_CLM5\_CLIM\_2000]) while the regional changes are not uniform (**Figure S3**). The most prominent increase is found in Asia (+0.06 Tg-N  $\text{yr}^{-1}$  or +0.9% regionally), while the largest decrease is seen in Europe (−0.03 Tg-N  $\text{yr}^{-1}$  or −2.9%). When compared with IASI, [CAM4\_CLM5\_2000] and [CAM4\_CLM5\_CLIM\_2000] both have

closer-to-one  $\beta$  and closer-to-zero NMB and MFB than [CAM4\_CMIP6\_2000] (Figure S4), indicating that coupling the land-atmosphere N-cycle could reduce model low-bias.

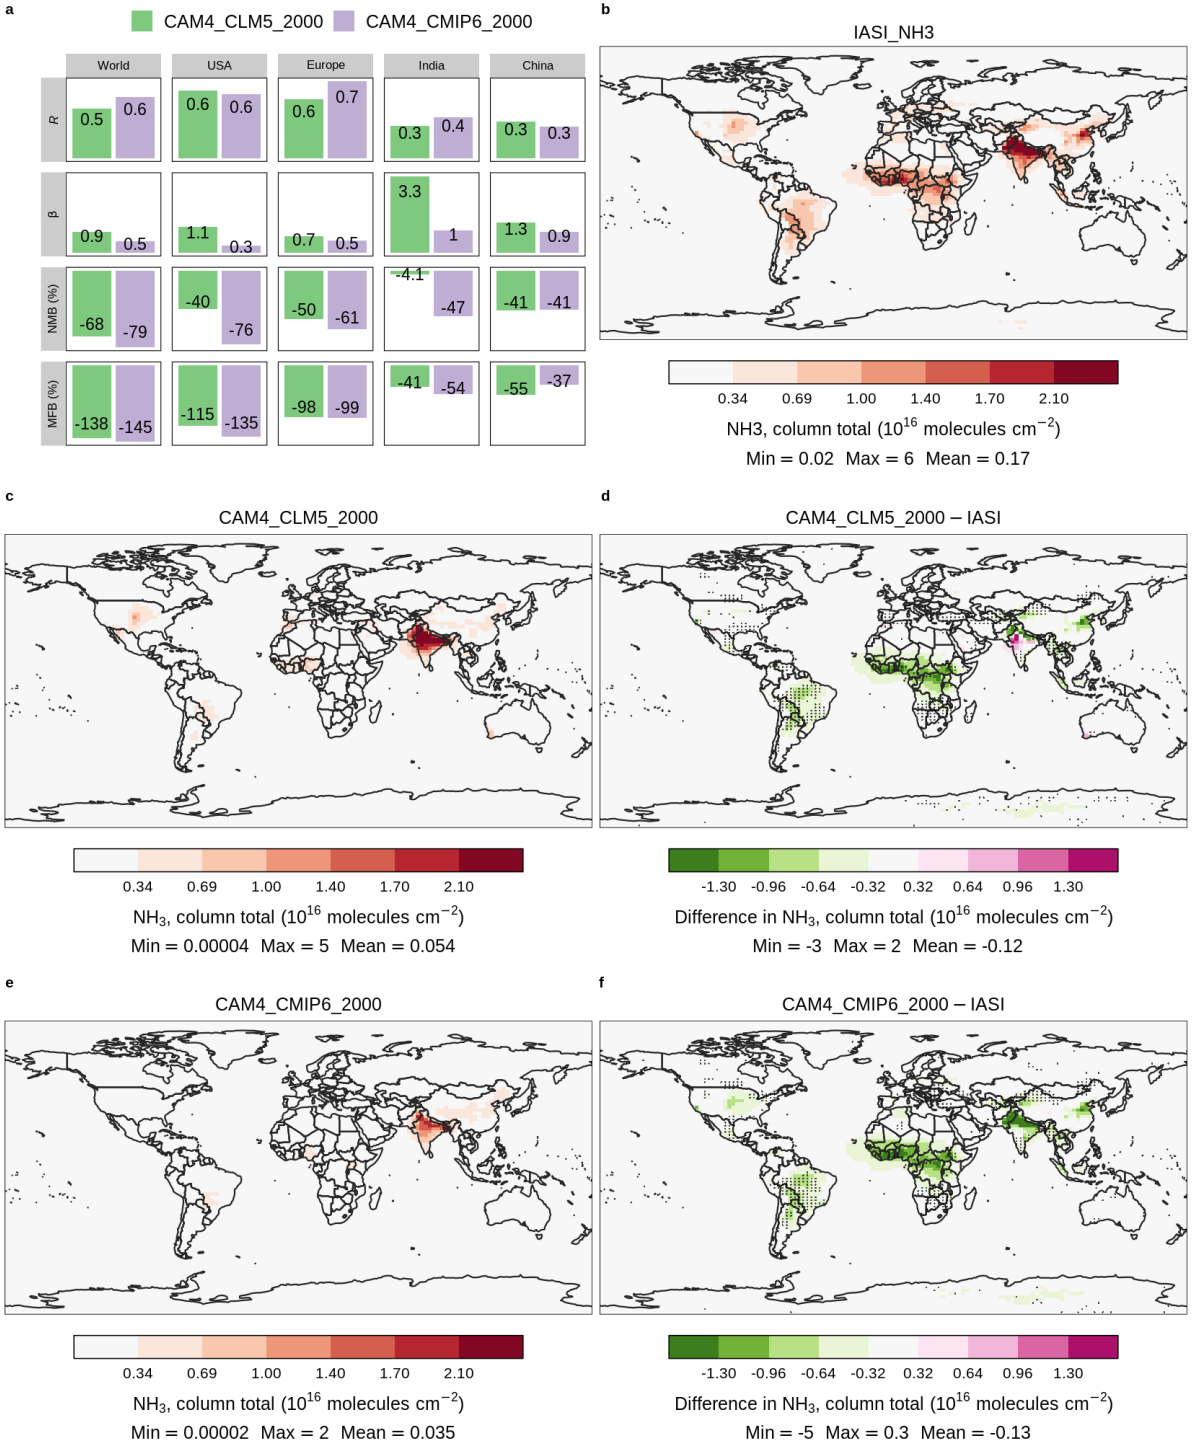

**Figure 4.** Annual-mean atmospheric NH<sub>3</sub> estimated by CAM4-chem with online CLM5 simulation and CMIP6 emission inventory as inputs of fertilizer-induced NH<sub>3</sub> emission, which are aliased as [CAM4\_CLM5\_2000] and

[CAM4\_CMIP6\_2000], respectively. Panel (a) summarizes the correlation analysis between the two simulations and the IASI satellite retrievals. Panels (b), (c), and (e) show the column  $\text{NH}_3$  concentration of IASI and the two cases correspondingly. Panels (d), and (f) show concentration differences between each case and the IASI observations. Overlaying black dots in the difference maps indicate grid-cells with a high statistically significant spatiotemporal correlation (i.e.,  $R^2 > 50\%$ ,  $p < 0.05$ ) between CLM5 and IASI. Color scales are saturated at respective values, and ranges of values are shown in the legend titles.

### 3.3 When 30% more synthetic fertilizer is applied globally – a case study to reveal the importance of nitrogen deposition and aerosol-climate effect on $\text{NH}_3$ emission and grain production in a future scenario

Fertilizer use is predicted to increase by  $>30\%$  of 2000-level to boost grain production to meet the fast-growing food demand by 2050 (FAO, 2007). Such injection of soil nitrogen will not only enhance soil  $\text{NH}_3$  emission, but also alter atmospheric  $\text{NH}_4^+$  formation and its subsequent climate effects and deposition, which will induce secondary impacts on crop growth and  $\text{NH}_3$  re-emission. Here, we used the modified CLM5 and CAM4-chem to attribute such secondary impacts to nitrogen deposition and aerosol-climate effect. We performed this case study by scaling up the amounts of synthetic fertilizer application by 30% globally as input to the simulations detailed in **Table 1**. The application rate of manure fertilizer was assumed to be at the same level in both scenarios since increased usage would likely raise nitrogen leakage during production and transportation that are difficult to quantify and beyond the scope of this study.

Our model modifications enabled CLM5 to simulate dynamic competition depending on microbial activities, plant growth, and soil microclimate, as well as depositional soil nitrogen input and overlying climatic changes. [CAM4\_CLM5\_2000] and [CAM4\_CLM5\_2050] encapsulated the full functionality of our implementation, i.e., CAM4-chem receives the online CLM5  $\text{NH}_3$  emission rates as input to predict atmospheric  $\text{NH}_3$  concentration, the subsequent formation of secondary ammonium aerosols, and the corresponding instantaneous aerosol radiative effect on climate, whilst CLM5 obtains the online CAM4-chem dry and wet deposition rates of  $\text{NH}_y$  and  $\text{NO}_x$  to calculate the addition of soil  $\text{NH}_4^+$  via deposition. The deposited nitrogen will eventually enrich soil fertility and fuel the re-emission of soil  $\text{NH}_3$  while the aforementioned aerosol radiative effect can cool the

Earth's surface and suppress NH<sub>3</sub> volatilization. [CAM4\_CLM5\_CLIM\_2050] was prescribed with constant nitrogen deposition fluxes so that we could quantify the instantaneous aerosol radiative effects. Similarly, [CAM4\_CLM5\_NDEP\_2050] was set up such that addition/reduction of NH<sub>3</sub>-induced aerosols would be inactive to the radiative transfer module, i.e., would not induce changes in aerosol-climate interactions, so that we could isolate the impact of NH<sub>3</sub> deposition on NH<sub>3</sub> emission and crop growth.

**Table 4** summarizes the changes in annual-total fertilizer-induced NH<sub>3</sub> emission estimated by these simulations when the global synthetic fertilizer use rises to 130% of the 2000 level. The total fertilization rate at the 2050 level was 117 Tg-N yr<sup>-1</sup> (or +21% from the present-day total fertilization rate). We also computed the nitrogen leakage ratio (NLR) and nitrogen use efficiency (NUE) for each case. NLR maintains at ~15% for [CAM4\_CLM5\_2000] and [CAM4\_CLM5\_2050] while NUE decreases from 23% to 22%, respectively, indicating that the crops are under nitrogen surplus under this future fertilization scenario. This is also confirmed by the reduced ratio of crop uptake to fertilization from ~130% to ~115% (**Table S3**).

**Table 4.** Summary of N fluxes in the simulations averaged over 20 years.

|                            | Fertilization<br>(Tg-N yr <sup>-1</sup> ) | NH <sub>3</sub> Emission<br>(Tg-N yr <sup>-1</sup> ) | NLR*<br>(%) | Grain N<br>Harvested<br>(Tg-N yr <sup>-1</sup> ) | NUE#<br>(%) |
|----------------------------|-------------------------------------------|------------------------------------------------------|-------------|--------------------------------------------------|-------------|
| <b>CAM4_CLM5_2000</b>      | 96.5                                      | 14.2                                                 | 14.7        | 21.9                                             | 22.7        |
| <b>CAM4_CLM5_2050</b>      | 117.0                                     | 17.5                                                 | 14.9        | 25.5                                             | 21.8        |
| <b>CAM4_CLM5_CLIM_2050</b> | 117.0                                     | 17.0                                                 | 14.5        | 24.3                                             | 20.8        |
| <b>CAM4_CLM5_NDEP_2050</b> | 117.0                                     | 17.9                                                 | 15.3        | 25.6                                             | 21.9        |

\* Nitrogen Leakage Ratio (NLR) = NH<sub>3</sub> Emission / Fertilization

# Nitrogen Use Efficiency (NUE) = Grain N Harvested / Fertilization

**Figure 5(b)** shows the changes of the fully coupled case, [CAM4\_CLM5\_2050], which estimated that global emission will rise by 3.3 Tg-N yr<sup>-1</sup> more of fertilizer-associated NH<sub>3</sub> emission than the baseline case, i.e., [CAM4\_CLM5\_2000]. The super-linear increase in NH<sub>3</sub> emission (+24%) relative to total fertilizer (+21%) is associated with sub-linear rise in nitrification (+17%), crop uptake (+5.8%) and other loss processes of soil NH<sub>4</sub><sup>+</sup>. It is a result



of a larger tendency of  $\text{NH}_3$  volatilization compared to other loss processes during the 20 days of intensive fertilizer application period, highlighting that our model modifications enabled CLM5 to simulate the dynamic competing processes of soil nitrogen. Regionally, changes in Indian and Chinese emissions are the highest, generally overlapping with the high fertilization zones (Figure S5), totaling a  $+1.6 \text{ Tg-N yr}^{-1}$  or  $+24\%$  for Asia relative to the baseline.

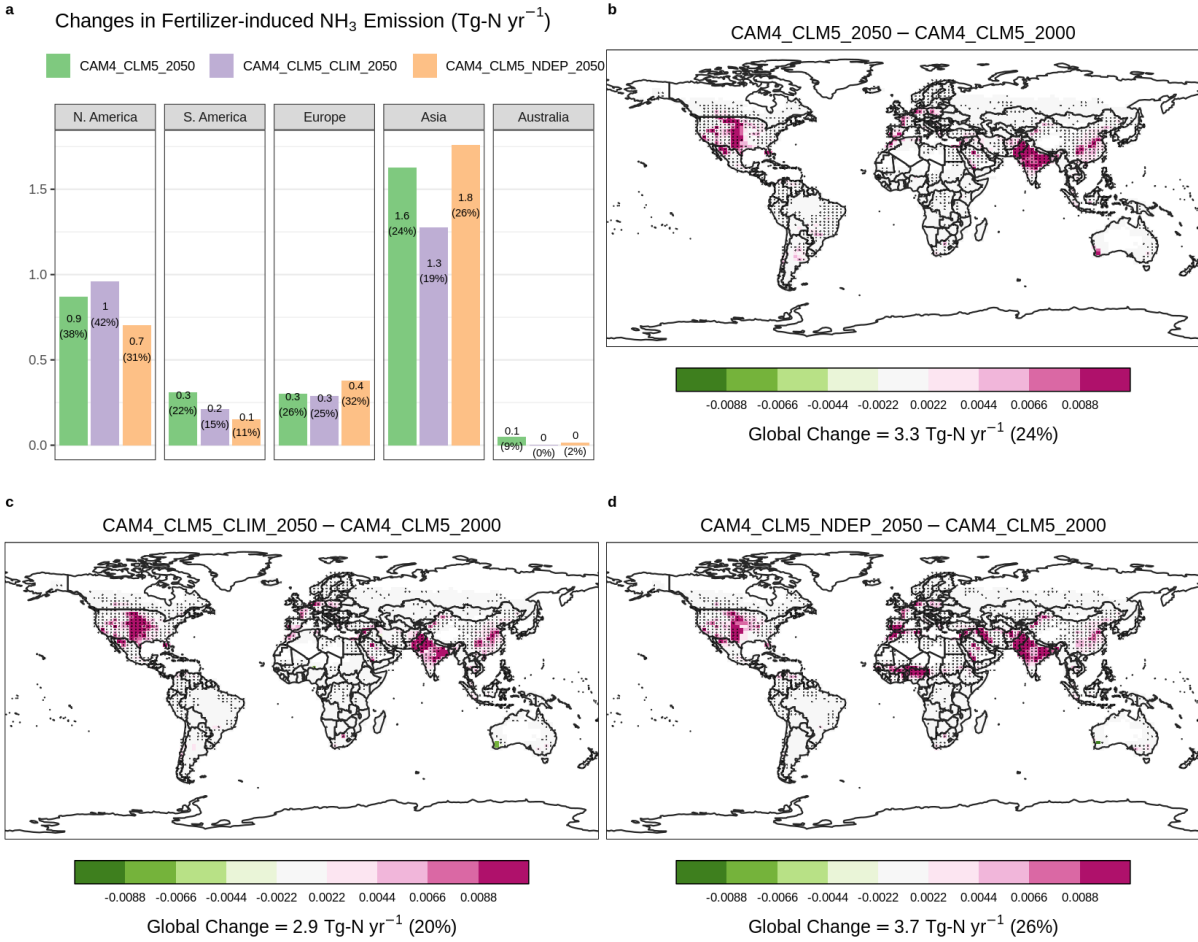

**Figure 5.** Changes in annual-total fertilizer-induced  $\text{NH}_3$  emission at the present-day synthetic fertilizer usage to the future scenario. Panel (a) summarizes regional changes relative to [CAM4\_CLM5\_2000]. Spatial distribution of the changes from [CAM4\_CLM5\_2000] with [CAM4\_CLM5\_2050] is shown in panel (b), with [CAM4\_CLM5\_CLIM\_2050] in (c), and with [CAM4\_CLM5\_NDEP\_2050] in (d). Overlaying black dots indicate grid-cells with a statistically significant difference under two-sample t-tests (i.e.,  $p < 0.05$ ) between corresponding simulations. Color scales are saturated at respective values.

CLM5 assumes a harvest efficiency of 85% (Lawrence et al., 2020). [CAM4\_CLM5\_2050] estimated that, with nitrogen deposition and aerosol climate effect, 243 Tg yr<sup>-1</sup> (in dry matter, hereinafter) more grain is produced than the baseline (see **Figure 6(b)**). Such enhancement is found dominantly over the food-producing regions over Europe (+76 Tg yr<sup>-1</sup> or +17%) and North America (+78 Tg yr<sup>-1</sup> or +17%). The grain production in Asia has divergent responses to induced fertilizers (increases in northern China and decreases in southern India). It is because the warmer temperature (**Figure S6**) allows crops to reach maturity sooner, hence shortening their grain filling periods (reduced N uptake as found in **Figure S7**). This results in a smaller Asian grain production increase of +55 Tg yr<sup>-1</sup> (+4%).

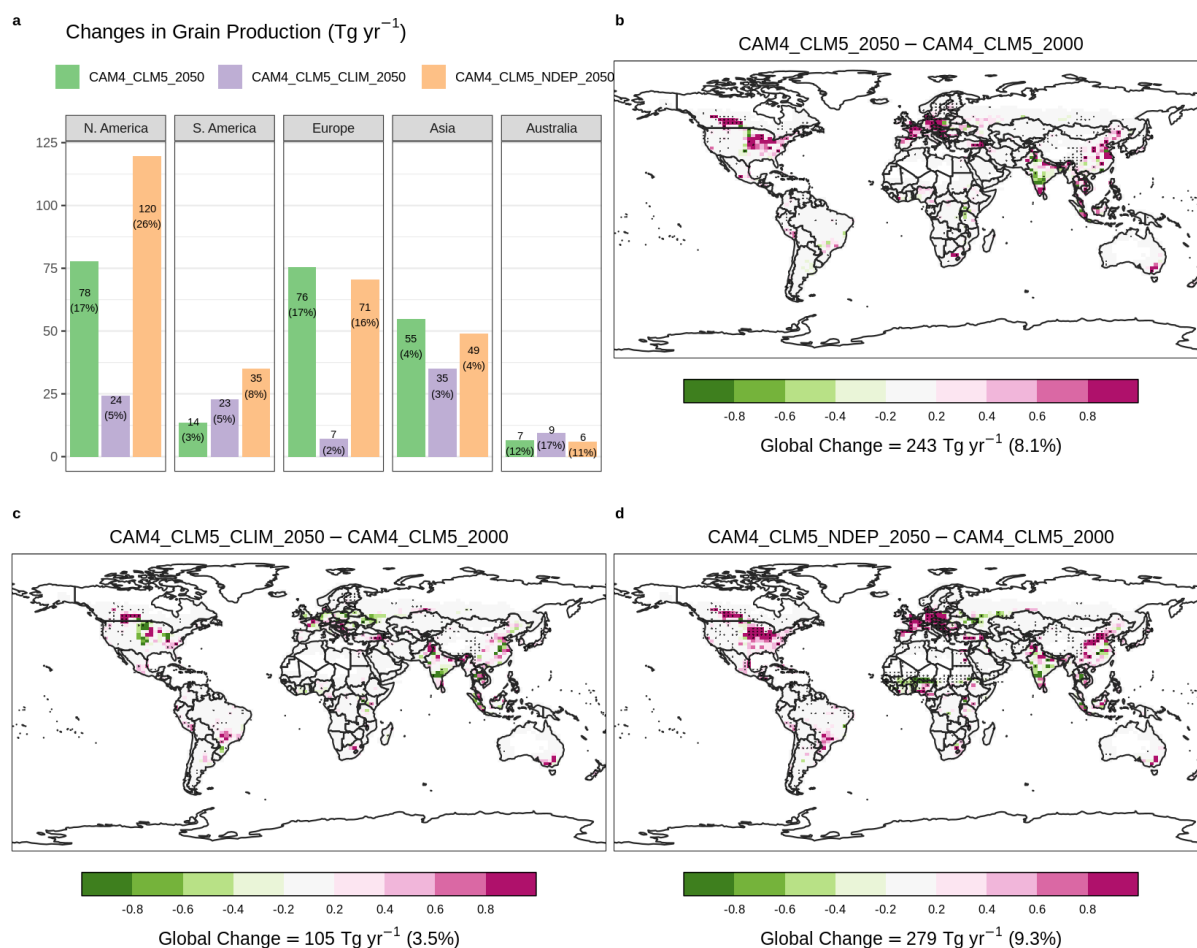

**Figure 6.** Same as **Figure 5** but for annual-total grain production (in Tg-(dry matter) yr<sup>-1</sup>).

We evaluated the impacts of dynamic processes in our simulations by comparing the fully-coupled simulation with other cases, i.e., the effects of including dynamic nitrogen deposition ( $\Delta_{\text{ndep}} = [\text{CAM4\_CLM5\_2050}] - [\text{CAM4\_CLM5\_CLIM\_2050}]$ ) and aerosol-climate interaction ( $\Delta_{\text{clim}} = [\text{CAM4\_CLM5\_2050}] - [\text{CAM4\_CLM5\_NDEP\_2050}]$ ) in the model.

As agricultural  $\text{NH}_3$  is injected to the atmosphere, it rapidly neutralizes other acidic chemicals and facilitates the formation of particulate  $\text{NH}_4^+$ . Some of the nitrogen particles return to the surface via deposition, sequentially fuel soil  $\text{NH}_3$  emission and boost crop growth. Our simulation shows that nitrogen deposition is enhanced by  $1.6 \text{ Tg-N yr}^{-1}$ , mostly in the US and India (**Figure S8(a)**). It translates to an increased  $\text{NH}_3$  emission by  $0.47 \text{ Tg-N yr}^{-1}$  globally (**Figure 7**), but the enhancement is seen mostly in India. On the contrary, there is a decrease in  $\text{NH}_3$  emission over the US. The increase/decrease is associated with a higher/lower annual-mean surface temperature (**Figure S9(a)**). In addition to directly enhancing the tendency of  $\text{NH}_3$  volatilization, a warmer surface temperature also shortens crop growth and grain filling period, resulting in lower crop nitrogen uptake (**Figure S10(a)**) and less grain production (**Figure 8(a)**), e.g., in India. Though the impacts of the larger nitrogen deposition in  $\Delta_{\text{ndep}}$  are not evenly distributed spatially, it boosts grain production by  $138 \text{ Tg-N}$  globally.

On the other hand, we expected the sulfate-nitrate-ammonium (SNA) particles induced by agricultural  $\text{NH}_3$ , which either directly increases aerosol albedo or enhances cloud brightness and influences cloud lifetime (Twomey, 1977; Albrecht, 1989), would reduce the amount of insolation reaching the Earth's surface. Compared to the default model, our fully coupled simulation estimated a  $0.13 \text{ W m}^{-2}$  increase in global downward radiative flux, which is substantial compared to the total aerosol radiative forcing of  $+1.0 \text{ Wm}^{-2}$  (Myhre et al., 2013).  $\Delta_{\text{clim}}$  reveals the substantial changes in net downward radiation at the surface level (**Figure S11**) due to the difference in the formation of particulate sulfate (**Figure S12**) and  $\text{NH}_4^+$  (**Figure S13**), which further alter the changes in surface temperature (**Figure S9**). Such changes in surface temperature reduce  $\text{NH}_3$  emission substantially over Africa, while promoting  $\text{NH}_3$  volatilization in India and the North and South America, resulting in a net decrease by  $0.41 \text{ Tg-N yr}^{-1}$  globally. Grain production decreases by  $36 \text{ Tg-N yr}^{-1}$  in  $\Delta_{\text{clim}}$ , indicating that the warming induced by aerosol-radiation interaction partly offsets the benefit of nitrogen deposition as an extra input of soil  $\text{NH}_4^+$  for crop growth and yield, though the deposition rate is increased slightly over the US (**Figure S8(b)**).

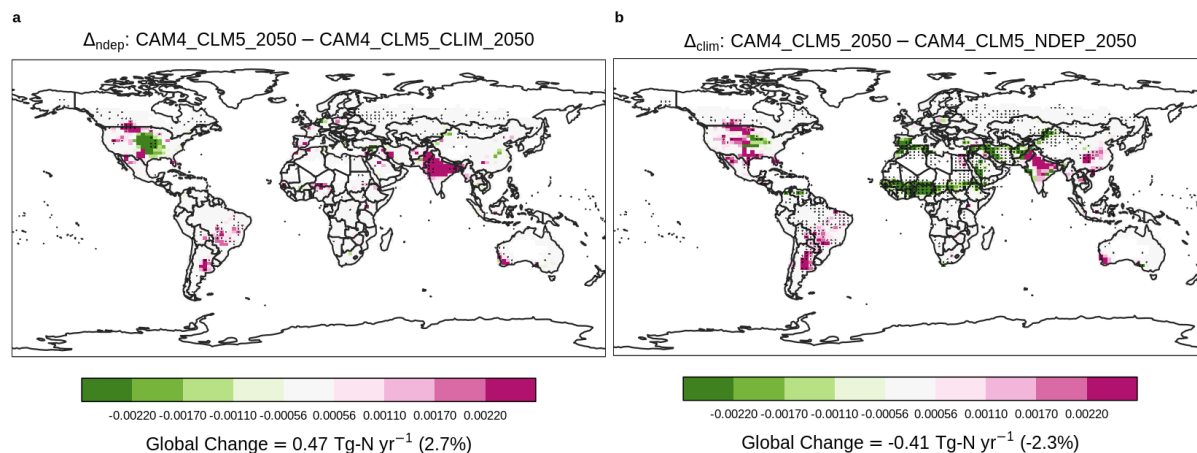

635 **Figure 7.** Contrasting the difference in NH<sub>3</sub> emission (Tg-N yr<sup>-1</sup>). Overlaying black dots indicate grid-cells with a statistically significant difference under two-sample t-tests (i.e.,  $p < 0.05$ ) between corresponding simulations. Only results of grid-cells with croplands are shown.

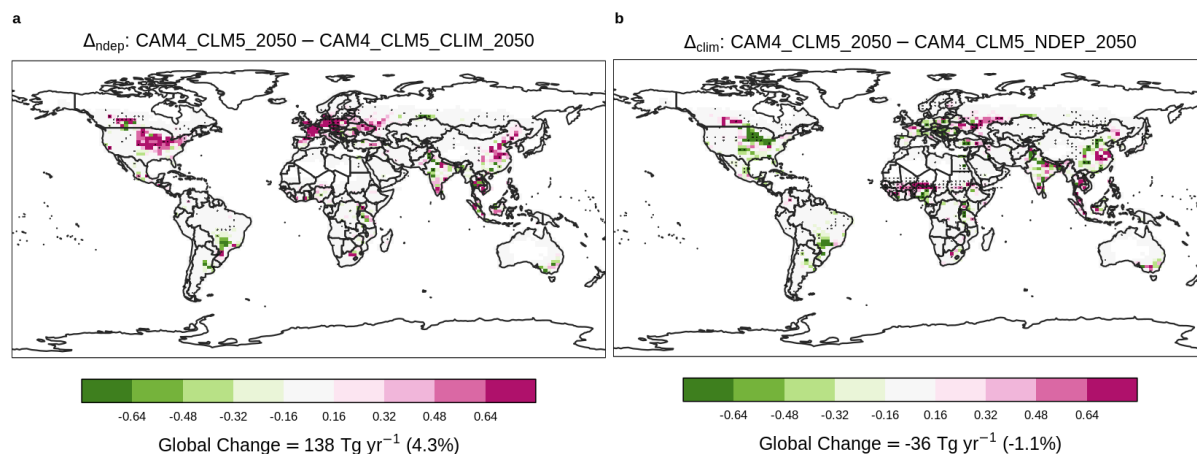

640 **Figure 8.** Contrasting the difference in grain production (Tg-dry-matter yr<sup>-1</sup>). Overlaying black dots indicate grid-cells with a statistically significant difference under two-sample t-tests (i.e.,  $p < 0.05$ ) between corresponding simulations. Only results of grid-cells with croplands are shown.

#### 4. Conclusions

In this study, we implemented into the land and biogeochemical model, CLM5, new mechanistic schemes to better represent fertilizer-induced  $\text{NH}_3$  emission from agricultural soil. Our modifications allowed CLM5 and CAM4-chem to dynamically exchange fluxes associated with reactive nitrogen deposition and  $\text{NH}_3$  emission. These new features enabled CESM2 to perform, for the first time, a more reliable estimation of soil  $\text{NH}_3$  emission and atmospheric  $\text{NH}_3$  concentration than using constant emission inventory values under dynamic climate and environmental conditions. We verified that a fully coupled simulation case, [CAM4\_CLM5\_2000], produced an estimation of  $\text{NH}_3$  emission that agrees fairly well spatially and temporally with the emission inventories, MASAGE (Paulot et al., 2014) and CMIP6 (Hoesly et al., 2018b), especially over high-emission regions (see **Figure 2**). When compared to the IASI satellite observations (Van Damme et al., 2018), online  $\text{NH}_3$  emission input in CLM5 reduces the low-biases exhibited in CAM4-chem estimation of atmospheric  $\text{NH}_3$  using the CMIP6  $\text{NH}_3$  emission inventory.

Our modifications also enabled us to understand how  $\text{NH}_3$  emission influences aerosol formation and aerosol radiative effect, and their secondary impacts on the re-emission of  $\text{NH}_3$  and grain production. Our fully coupled simulation, [CAM4\_CLM5\_2000], re-creates the spatial distribution of the emission hotspots observed by satellite over intensive agricultural regions including China, India, Europe, and the US (see **Figure 4**). We also estimate that if the synthetic fertilizer use was to increase by 30% from 2000's level,  $\text{NH}_3$  emission would rise by  $3.3 \text{ Tg-N yr}^{-1}$  globally (see **Figure 5**). We further performed two simulations to highlight the importance of including a fully coupled nitrogen cycle in the model. Our results showed that lacking dynamic N deposition would underestimate  $\text{NH}_3$  emission and grain production under intensified fertilization while ignoring the aerosol-radiation interaction would lead to overestimation.

This study demonstrates a modeling approach to estimate the climatic and environmental sensitivity of  $\text{NH}_3$  emission, with a focus on sources associated with manure and synthetic fertilizer only. Other primary sources of atmospheric  $\text{NH}_3$  include manure management and application (47%), ocean (16%), and biomass burning (11%) (e.g., Bouwman et al., 1997; Sutton et al., 2013; Paulot et al., 2014, 2015). Unlike soil emission whereby the volatilization of  $\text{NH}_3$  depends on a series of biogeochemical processes, emissions associated

675 with manure management are typically estimated differently, e.g., collecting activity data and  
emission factors from factory managers, and installing monitoring instruments at outlets of  
confined facilities, e.g., animal factories (Bouwman et al., 1997; Paulot et al., 2014). Manure  
production, storage, and usage can be collected by surveying practices adopted by farmers  
while its associated  $\text{NH}_3$  emission can be estimated using source-specific emission factors and  
680 weather data, especially dominant factors such as air temperature, wind speed, and humidity.  
Fire emission directly injects the reactive nitrogen into the atmosphere, and satellite  
measurement is capable of capturing such short-term ammonia blooms (Van Damme et al.,  
2017). We did not include manure application in our study due to the high uncertainty and data  
insufficiency for validation. It is noteworthy that manure is attributable up to ~60 % of total  
685 soil  $\text{NH}_3$  emission (Vira et al., 2020) and hence shall warrant further research efforts in terms  
of its downstream impact on ecosystems via nitrogen deposition and aerosol radiative effect.

We also incorporated a prognostic parameterization for canopy capture of the emitted  
 $\text{NH}_3$ , which is an improvement when compared to previous studies that assigned blanket  
reduction factors to all vegetated land types (Bouwman et al., 1997; Riddick et al., 2016; Vira  
690 et al., 2020). Despite such addition, our model still shows systematic high-biases, implying  
room for improvement, including further calibration of the canopy capture effects against field  
measurements. Another source of uncertainties stems from the model's initial soil  $\text{NH}_4^+$  content,  
which determines the potential emission rate of  $\text{NH}_3$ . The overestimation by CLM5 in this  
study may point to the more-fertile-than-reality soil conditions in the model, highlighting the  
695 need for a more realistic soil nitrogen map compiled by field surveys to better constrain the  
initial conditions for the model. We also note that such field surveys would also be useful to  
infer a soil pH map that constraints the uncertainty in simulations using a constant pH, like  
those reported in this study.

Our schemes simplified the fate of  $\text{NH}_3$  captured by the canopy and assumed that such  
700  $\text{NH}_3$  is returned to the soil and becomes immediately accessible to plants, soil microbes, and  
bacteria, due to limited knowledge of the consequences of the canopy capturing process. A  
chamber study suggested that soybean can absorb up to  $20 \text{ kg-N ha}^{-1}$  of  $\text{NH}_3$  via leaf capturing  
(Hutchinson et al., 1972), which is a significant amount compared to average fertilizer use for  
soybean of  $13\text{--}45 \text{ kg-N ha}^{-1}$  in CLM5. On the other hand, concentrated  $\text{NH}_3$  could damage leaf  
705 tissues if the contacting plant fails to metabolize or detoxify such a reactive gas in time (Nemitz

et al., 2001). The remaining captured  $\text{NH}_3$  on the leaf surface can return to the soil via throughfall, but its magnitude is difficult to measure. These unspecified processes may induce uncertainties in our simulations, especially for plant growth and soil  $\text{NH}_4^+$  content. This knowledge gap points to a demand for more field experiments to investigate the impacts of these processes.

FAO projects that fertilizer use will be increased by >30% (FAO, 2007) to boost food production to meet the fast-growing food demand by 2050. Such additional fertilizer injects mineral nitrogen into the soil that further fuels the volatilization of  $\text{NH}_3$  spontaneously and hence promotes the subsequent formation of aerosol particles. This study shows the nonlinear impacts of nitrogen deposition and aerosol radiative effect on the environment. Thus, our work makes it possible to evaluate the intertwined consequences of such soaring use of fertilizer on  $\text{NH}_3$  emission, atmospheric aerosols composition, and the corresponding aerosol-climate effect. Our results can provide scientific information to aid stakeholders in evaluating various global and regional plans for mitigating climate change and safeguarding a sustainable environment.

### **Code availability**

The modified codes of CESM2 developed in this study will be available when this manuscript is accepted.

725

### **Author Contribution**

All co-authors participated in designing the experiments. KMF and MVM developed the model code. KMF performed the simulations. KMF prepared the manuscript with contributions from all co-authors.

730

### **Competing Interests**

The authors declare that they have no conflict of interest.

### **Acknowledgments**

735 This work was supported by the Research Grants Council (RGC) General Research Fund (Project #: 14323116) awarded to A. P. K. Tai. M. Val Martin acknowledges funding from the Leverhulme Trust through a Leverhulme Research Centre Award (RC-2015-029) and the UKRI Future Leaders Fellowship Programme (MR/T019867/1). We would also like to acknowledge the high-performance computing support from Cheyenne  
740 (doi:10.5065/D6RX99HX) provided by NCAR's Computational and Information Systems Laboratory, sponsored by the National Science Foundation. We also thank the reviewers of this manuscript for their constructive feedback.



## References

- Albrecht, B. A.: Aerosols, Cloud Microphysics, and Fractional Cloudiness, *Science*, 245, 1227–1230, <https://doi.org/10.1126/science.245.4923.1227>, 1989.
- CAM Reference Manual: [https://www.cesm.ucar.edu/models/cesm1.2/cam/docs/rm5\\_3/](https://www.cesm.ucar.edu/models/cesm1.2/cam/docs/rm5_3/), last access: 4 August 2021.
- Ansari, A. S. and Pandis, S. N.: Response of inorganic PM to precursor concentrations, 32, 2706–2714, <https://doi.org/10.1021/es971130j>, 1998.
- Balasubramanian, S., Koloutsou-Vakakis, S., McFarland, D. M., and Rood, M. J.: Reconsidering emissions of ammonia from chemical fertilizer usage in midwest USA, 120, 6232–6246, <https://doi.org/10.1002/2015JD023219>, 2015.
- Balasubramanian, S., Nelson, A., Koloutsou-Vakakis, S., Lin, J., Rood, M. J., Myles, L. T., and Bernacchi, C.: Evaluation of DeNitrification DeComposition model for estimating ammonia fluxes from chemical fertilizer application, 237–238, 123–134, <https://doi.org/10.1016/j.agrformet.2017.02.006>, 2017.
- Beeckman, F., Motte, H., and Beeckman, T.: Nitrification in agricultural soils: impact, actors and mitigation, 50, 166–173, <https://doi.org/10.1016/j.copbio.2018.01.014>, 2018.
- Behera, S. N. and Sharma, M.: Transformation of atmospheric ammonia and acid gases into components of PM<sub>2.5</sub>: An environmental chamber study, 19, 1187–1197, <https://doi.org/10.1007/s11356-011-0635-9>, 2012.
- Bodirsky, B. L., Popp, A., Lotze-Campen, H., Dietrich, J. P., Rolinski, S., Weindl, I., Schmitz, C., Müller, C., Bonsch, M., Humpeöder, F., Biewald, A., and Stevanovic, M.: Reactive nitrogen requirements to feed the world in 2050 and potential to mitigate nitrogen pollution, 5, 765, <https://doi.org/10.1038/ncomms4858>, 2014.
- Bonan, G. B., Levis, S., Kergoat, L., and Oleson, K. W.: Landscapes as patches of plant functional types: An integrating concept for climate and ecosystem models, 16, 5-1-5–23, <https://doi.org/10.1029/2000gb001360>, 2002.
- Bouwman, A. F., Lee, D. S., Asman, W. A. H., Dentener, F. J., Van Der Hoek, K. W., and Olivier, J. G. J.: A global high-resolution emission inventory for ammonia, 11, 561–587, <https://doi.org/10.1029/97GB02266>, 1997.
- Bouwman, A. F., Boumans, L. J. M., and Batjes, N. H.: Estimation of global NH<sub>3</sub> volatilization loss from synthetic fertilizers and animal manure applied to arable lands and grasslands: AMMONIA EMISSION FROM FERTILIZERS, *Global Biogeochem. Cycles*, 16, 8-1-8–14, 775, <https://doi.org/10.1029/2000GB001389>, 2002.
- Clarisse, L., Clerbaux, C., Dentener, F., Hurtmans, D., and Coheur, P. F.: Global ammonia distribution derived from infrared satellite observations, 2, 479–483, <https://doi.org/10.1038/ngeo551>, 2009.

- Clarisse, L., Shephard, M. W., Dentener, F., Hurtmans, D., Cady-Pereira, K., Karagulian, F.,  
780 Van Damme, M., Clerbaux, C., and Coheur, P. F.: Satellite monitoring of ammonia: A case  
study of the San Joaquin Valley, 115, 1–15, <https://doi.org/10.1029/2009JD013291>, 2010.
- Crippa, M., Guizzardi, D., Muntean, M., Schaaf, E., Dentener, F., Van Aardenne, J. A., Monni,  
S., Doering, U., Olivier, J. G. J., Pagliari, V., and Janssens-Maenhout, G.: Gridded emissions  
785 of air pollutants for the period 1970-2012 within EDGAR v4.3.2, 10, 1987–2013,  
<https://doi.org/10.5194/essd-10-1987-2018>, 2018.
- Van Damme, M., Clarisse, L., Heald, C. L., Hurtmans, D., Ngadi, Y., Clerbaux, C., Dolman,  
A. J., Erisman, J. W., and Coheur, P. F.: Global distributions, time series and error  
characterization of atmospheric ammonia (NH<sub>3</sub>) from IASI satellite observations, 14, 2905–  
2922, <https://doi.org/10.5194/acp-14-2905-2014>, 2014.
- 790 Van Damme, M., Whitburn, S., Clarisse, L., Clerbaux, C., Hurtmans, D., and Coheur, P. F.:  
Version 2 of the IASI NH<sub>3</sub> neural network retrieval algorithm: Near-real-time and reanalysed  
datasets, 10, 4905–4914, <https://doi.org/10.5194/amt-10-4905-2017>, 2017.
- Van Damme, M., Clarisse, L., Whitburn, S., Hadji-Lazaro, J., Hurtmans, D., Clerbaux, C., and  
Coheur, P. F.: Industrial and agricultural ammonia point sources exposed, 564, 99–103,  
795 <https://doi.org/10.1038/s41586-018-0747-1>, 2018.
- Drewniak, B., Song, J., Prell, J., Kotamarthi, V. R., and Jacob, R.: Modeling agriculture in the  
Community Land Model, 6, 495–515, <https://doi.org/10.5194/gmd-6-495-2013>, 2013.
- Dutta, B., Congreves, K. A., Smith, W. N., Grant, B. B., Rochette, P., Chantigny, M. H., and  
Desjardins, R. L.: Improving DNDC model to estimate ammonia loss from urea fertilizer  
800 application in temperate agroecosystems, 106, 275–292, <https://doi.org/10.1007/s10705-016-9804-z>, 2016.
- Emmons, L. K., Walters, S., Hess, P. G., Lamarque, J. F., Pfister, G. G., Fillmore, D., Granier,  
C., Guenther, A., Kinnison, D., Laepple, T., Orlando, J., Tie, X., Tyndall, G., Wiedinmyer, C.,  
Baughcum, S. L., and Kloster, S.: Description and evaluation of the Model for Ozone and  
805 Related chemical Tracers, version 4 (MOZART-4), 3, 43–67, <https://doi.org/10.5194/gmd-3-43-2010>, 2010.
- European Environment Agency: Ammonia ( NH<sub>3</sub> ) emissions, 2010.
- European Environment Agency: EMEP/EEA air pollutant emission inventory guidebook 2013:  
Exhaust emissions from road transport, 160, <https://doi.org/10.2800/92722>, 2013.
- 810 Fangmeierfl, A., Hadwiger-Fangmeierfl, A., Van Der Eerden, L., and J~iger, H.-J.:  
<Fangmeier et al. (1994).PDF>, Environmental Pollution, 43 pp., 1994.
- FAO: Re-estimation of Global Fertilizer Requirement for 2015, 2030 and 2050, 2007.
- Gardner, W. R.: Movement of Nitrogen in Soil, in: Soil Nitrogen, John Wiley & Sons, Ltd,  
550–572, <https://doi.org/10.2134/agronmonogr10.c15>, 1965.

- 815 Gilhespy, S. L., Anthony, S., Cardenas, L., Chadwick, D., del Prado, A., Li, C., Misselbrook, T., Rees, R. M., Salas, W., Sanz-Cobena, A., Smith, P., Tilston, E. L., Topp, C. F. E., Vetter, S., and Yeluripati, J. B.: First 20 years of DNDC (DeNitrification DeComposition): Model evolution, 292, 51–62, <https://doi.org/10.1016/j.ecolmodel.2014.09.004>, 2014.
- 820 Gu, B. B. B., Ge, Y., Ren, Y., Xu, B., Luo, W., Jiang, H., Gu, B. B. B., and Chang, J.: Atmospheric Reactive Nitrogen in China: Sources, Recent Trends, and Damage Costs, 46, 9420–9427, <https://doi.org/10.1021/es301446g>, 2012.
- 825 Guenther, A. B., Jiang, X., Heald, C. L., Sakulyanontvittaya, T., Duhl, T., Emmons, L. K., and Wang, X.: The model of emissions of gases and aerosols from nature version 2.1 (MEGAN2.1): An extended and updated framework for modeling biogenic emissions, 5, 1471–1492, <https://doi.org/10.5194/gmd-5-1471-2012>, 2012.
- Guthrie, S., Dunkerley, F., Tabaqchali, H., Harshfield, A., Ioppolo, B., and Manville, C.: Impact of ammonia emissions from agriculture on biodiversity: An evidence synthesis, <https://doi.org/10.7249/rr2695>, 2018.
- 830 He, J., Zhang, Y., Glotfelty, T., He, R., Bennartz, R., Rausch, J., and Sartelet, K.: Decadal simulation and comprehensive evaluation of CESM/CAM5.1 with advanced chemistry, aerosol microphysics, and aerosol-cloud interactions, *J. Adv. Model. Earth Syst.*, 7, 110–141, <https://doi.org/10.1002/2014MS000360>, 2015.
- 835 Hoesly, R. M., Smith, S. J., Feng, L., Klimont, Z., Janssens-Maenhout, G., Pitkanen, T., Seibert, J. J., Vu, L., Andres, R. J., Bolt, R. M., Bond, T. C., Dawidowski, L., Kholod, N., Kurokawa, J., Li, M., Liu, L., Lu, Z., Moura, M. C. P., O’Rourke, P. R., and Zhang, Q.: Historical (1750–2014) anthropogenic emissions of reactive gases and aerosols from the Community Emissions Data System (CEDS), *Geosci. Model Dev.*, 11, 369–408, <https://doi.org/10.5194/gmd-11-369-2018>, 2018a.
- 840 Hoesly, R. M., Smith, S. J., Feng, L., Klimont, Z., Janssens-Maenhout, G., Pitkanen, T., Seibert, J. J., Vu, L., Andres, R. J., Bolt, R. M., Bond, T. C., Dawidowski, L., Kholod, N., Kurokawa, J., Li, M., Liu, L., Lu, Z., Moura, M. C. P., O’Rourke, P. R., and Zhang, Q.: Historical (1750–2014) anthropogenic emissions of reactive gases and aerosols from the Community Emissions Data System (CEDS), 11, 369–408, <https://doi.org/10.5194/gmd-11-369-2018>, 2018b.
- 845 Van Hove, L. W. A., Koops, A. J., Adema, E. H., Vredenberg, W. J., and Pieters, G. A.: Analysis of the uptake of atmospheric ammonia by leaves of *Phaseolus vulgaris* L., 21, 1759–1763, [https://doi.org/10.1016/0004-6981\(87\)90115-6](https://doi.org/10.1016/0004-6981(87)90115-6), 1987.
- 850 Huang, X., Song, Y., Li, M., Li, J., Huo, Q., Cai, X., Zhu, T., Hu, M., and Zhang, H.: A high-resolution ammonia emission inventory in China, 26, 1–14, <https://doi.org/10.1029/2011GB004161>, 2012.
- Huijsmans, J. F. M., Vermeulen, G. D., Hol, J. M. G., and Goedhart, P. W.: A model for estimating seasonal trends of ammonia emission from cattle manure applied to grassland in the Netherlands, 173, 231–238, <https://doi.org/10.1016/j.atmosenv.2017.10.050>, 2018.

- 855 Hurrell, J. W., Hack, J. J., Shea, D., Caron, J. M., and Rosinski, J.: A new sea surface temperature and sea ice boundary dataset for the community atmosphere model, 21, 5145–5153, <https://doi.org/10.1175/2008JCLI2292.1>, 2008.
- 860 Hurrell, J. W., Holland, M. M., Gent, P. R., Ghan, S., Kay, J. E., Kushner, P. J., Lamarque, J.-F., Large, W. G., Lawrence, D., Lindsay, K., Lipscomb, W. H., Long, M. C., Mahowald, N., Marsh, D. R., Neale, R. B., Rasch, P., Vavrus, S., Vertenstein, M., Bader, D., Collins, W. D., Hack, J. J., Kiehl, J., and Marshall, S.: The Community Earth System Model: A Framework for Collaborative Research, 130204122247009, <https://doi.org/10.1175/bams-d-12-00121>, 2013.
- 865 Hurtt, G. C., Chini, L. P., Frolking, S., Betts, R. A., Feddema, J., Fischer, G., Fisk, J. P., Hibbard, K., Houghton, R. A., Janetos, A., Jones, C. D., Kindermann, G., Kinoshita, T., Klein Goldewijk, K., Riahi, K., Shevliakova, E., Smith, S., Stehfest, E., Thomson, A., Thornton, P., van Vuuren, D. P., and Wang, Y. P.: Harmonization of land-use scenarios for the period 1500–2100: 600 years of global gridded annual land-use transitions, wood harvest, and resulting secondary lands, 109, 117–161, <https://doi.org/10.1007/s10584-011-0153-2>, 2011.
- 870 Hutchinson, G. L., Millington, R. J., and Peters, D. B.: Atmospheric Ammonia: Absorption by Plant Leaves, 175, 771–772, <https://doi.org/10.1126/science.175.4023.771>, 1972.
- Ianniello, A., Spataro, F., Esposito, G., Allegrini, I., Hu, M., and Zhu, T.: Chemical characteristics of inorganic ammonium salts in PM<sub>2.5</sub> in the atmosphere of Beijing (China), 11, 10803–10822, <https://doi.org/10.5194/acp-11-10803-2011>, 2011.
- 875 Institute for the Study of Earth, Oceans, and Space, University of New Hampshire: DNDC v9.5 Scientific Basis and Processes, 2017.
- 880 Janssens-Maenhout, G., Crippa, M., Guizzardi, D., Dentener, F., Muntean, M., Pouliot, G., Keating, T., Zhang, Q., Kurokawa, J., Wankmüller, R., Denier van der Gon, H., Kuenen, J. J. P., Klimont, Z., Frost, G., Darras, S., Koffi, B., and Li, M.: HTAP\_v2.2: a mosaic of regional and global emission grid maps for 2008 and 2010 to study hemispheric transport of air pollution, *Atmos. Chem. Phys.*, 15, 11411–11432, <https://doi.org/10.5194/acp-15-11411-2015>, 2015.
- Krupa, S. V.: Effects of atmospheric ammonia (NH<sub>3</sub>) on terrestrial vegetation: A review, 124, 179–221, [https://doi.org/10.1016/S0269-7491\(02\)00434-7](https://doi.org/10.1016/S0269-7491(02)00434-7), 2003.
- 885 Lamarque, J. F., Dentener, F., McConnell, J., Ro, C. U., Shaw, M., Vet, R., Bergmann, D., Cameron-Smith, P., Dalsoren, S., Doherty, R., Faluvegi, G., Ghan, S. J., Josse, B., Lee, Y. H., Mackenzie, I. A., Plummer, D., Shindell, D. T., Skeie, R. B., Stevenson, D. S., Strode, S., Zeng, G., Curran, M., Dahl-Jensen, D., Das, S., Fritzsche, D., and Nolan, M.: Multi-model mean nitrogen and sulfur deposition from the atmospheric chemistry and climate model intercomparison project (ACCMIP): Evaluation of historical and projected future changes, 13, 7997–8018, <https://doi.org/10.5194/acp-13-7997-2013>, 2013.
- 890 Lamarque, J.-F., Emmons, L. K., Hess, P. G., Kinnison, D. E., Tilmes, S., Vitt, F., Heald, C. L., Holland, E. A., Lauritzen, P. H., Neu, J., Orlando, J. J., Rasch, P. J., and Tyndall, G. K.: CAM-chem: description and evaluation of interactive atmospheric chemistry in the

Community Earth System Model, *Geosci. Model Dev.*, 5, 369–411, <https://doi.org/10.5194/gmd-5-369-2012>, 2012.

- 895 Lawrence, D., Fisher, R., Koven, C., Oleson, K., Swenson, S., and Vertenstein, M.: Technical Description of version 5.0 of the Community Land Model (CLM), 337, 2020.

- Lawrence, D. M., Fisher, R. A., Koven, C. D., Oleson, K. W., Swenson, S. C., Bonan, G., Collier, N., Ghimire, B., Kampenhout, L., Kennedy, D., Kluzek, E., Lawrence, P. J., Li, F., Li, H., Lombardozzi, D., Riley, W. J., Sacks, W. J., Shi, M., Vertenstein, M., Wieder, W. R., Xu, C., Ali, A. A., Badger, A. M., Bisht, G., Broeke, M., Brunke, M. A., Burns, S. P., Buzan, J., Clark, M., Craig, A., Dahlin, K., Drewniak, B., Fisher, J. B., Flanner, M., Fox, A. M., Gentine, P., Hoffman, F., Keppel-Aleks, G., Knox, R., Kumar, S., Lenaerts, J., Leung, L. R., Lipscomb, W. H., Lu, Y., Pandey, A., Pelletier, J. D., Perket, J., Randerson, J. T., Ricciuto, D. M., Sanderson, B. M., Slater, A., Subin, Z. M., Tang, J., Thomas, R. Q., Val Martin, M., and Zeng, X.: The Community Land Model Version 5: Description of New Features, Benchmarking, and Impact of Forcing Uncertainty, *J. Adv. Model. Earth Syst.*, 11, 4245–4287, <https://doi.org/10.1029/2018MS001583>, 2019.
- 900
- 905

Lawrence, P. J. and Chase, T. N.: Representing a new MODIS consistent land surface in the Community Land Model (CLM 3.0), 112, <https://doi.org/10.1029/2006JG000168>, 2007.

- 910 Levis, S., Badger, A., Drewniak, B., Nevison, C., and Ren, X.: CLMcrop yields and water requirements: avoided impacts by choosing RCP 4.5 over 8.5, 146, 501–515, <https://doi.org/10.1007/s10584-016-1654-9>, 2018.

- Li, C., Frohling, S., and Frohling, T. A.: A model of nitrous oxide evolution from soil driven by rainfall events: 1. Model structure and sensitivity, 97, 9759–9776, <https://doi.org/10.1029/92JD00509>, 1992.
- 915

Li, C., Salas, W., Zhang, R., Krauter, C., Rotz, A., and Mitloehner, F.: Manure-DNDC: A biogeochemical process model for quantifying greenhouse gas and ammonia emissions from livestock manure systems, 93, 163–200, <https://doi.org/10.1007/s10705-012-9507-z>, 2012.

- Lin, B. Le, Sakoda, A., Shibasaki, R., and Suzuki, M.: A modelling approach to global nitrate leaching caused by anthropogenic fertilisation, *Water Research*, 1961–1968 pp., [https://doi.org/10.1016/S0043-1354\(00\)00484-X](https://doi.org/10.1016/S0043-1354(00)00484-X), 2001.
- 920

Lombardozzi, D. L., Lu, Y., Lawrence, P. J., Lawrence, D. M., Swenson, S., Oleson, K. W., Wieder, W. R., and Ainsworth, E. A.: Simulating Agriculture in the Community Land Model Version 5, *J. Geophys. Res. Biogeosci.*, 125, <https://doi.org/10.1029/2019JG005529>, 2020.

- 925 Lu, X. K., Mo, J. M., and Dong, S. F.: Effects of nitrogen deposition on forest biodiversity: A review, *Shengtai Xuebao/ Acta Ecologica Sinica*, 5532–5548 pp., [https://doi.org/10.1016/S1872-2032\(09\)60012-3](https://doi.org/10.1016/S1872-2032(09)60012-3), 2008.

- Meinshausen, M., Vogel, E., Nauels, A., Lorbacher, K., Meinshausen, N., Etheridge, D. M., Fraser, P. J., Montzka, S. A., Rayner, P. J., Trudinger, C. M., Krummel, P. B., Beyerle, U., Canadell, J. G., Daniel, J. S., Enting, I. G., Law, R. M., Lunder, C. R., O’Doherty, S., Prinn, R. G., Reimann, S., Rubino, M., Velders, G. J. M., Vollmer, M. K., Wang, R. H. J., and Weiss,
- 930

R.: Historical greenhouse gas concentrations for climate modelling (CMIP6), *Geosci. Model Dev.*, 10, 2057–2116, <https://doi.org/10.5194/gmd-10-2057-2017>, 2017.

935 Myhre, G., Shindell, D., Bréon, F.-M., Collins, W., Fuglestad, J., Huang, J., Koch, D.,  
Lamarque, J.-F., Lee, D., Mendoza, B., Nakajima, T., Robock, A., Stephens, G., Zhang, H.,  
Aamaas, B., Boucher, O., Dalsøren, S. B., Daniel, J. S., Forster, P., Granier, C., Haigh, J.,  
Hodnebrog, Ø., Kaplan, J. O., Marston, G., Nielsen, C. J., O'Neill, B. C., Peters, G. P., Pongratz,  
J., Ramaswamy, V., Roth, R., Rotstayn, L., Smith, S. J., Stevenson, D., Vernier, J.-P., Wild,  
940 O., Young, P., Jacob, D., Ravishankara, A. R., and Shine, K.: 8 Anthropogenic and Natural  
Radiative Forcing, 82, 2013.

National Oceanic and Atmospheric Administration: Atmospheric Ammonia: Sources and Fate  
- A Review of Ongoing Federal Research and Future Need, *Journal of Molecular Liquids*, 2000.

945 Nemitz, E., Milford, C., and Sutton, M. A.: A two-layer canopy compensation point model for  
describing bi-directional biosphere-atmosphere exchange of ammonia, 127, 815–833,  
<https://doi.org/10.1256/smsqj.57305>, 2001.

Neu, J. L. and Prather, M. J.: Toward a more physical representation of precipitation  
scavenging in global chemistry models: Cloud overlap and ice physics and their impact on  
tropospheric ozone, 12, 3289–3310, <https://doi.org/10.5194/acp-12-3289-2012>, 2012.

950 Nevison, C., Hess, P., Riddick, S., and Ward, D.: Denitrification, leaching, and river nitrogen  
export in the Community Earth System Model, 8, 272–291,  
<https://doi.org/10.1002/2015MS000573>, 2016.

Paulot, F. and Jacob, D. J.: Hidden Cost of U.S. Agricultural Exports: Particulate Matter from  
Ammonia Emissions, 48, 903–908, <https://doi.org/10.1021/es4034793>, 2014.

955 Paulot, F., Jacob, D. J., Pinder, R. W., Bash, J. O., Travis, K., and Henze, D. K.: Ammonia  
emissions in the United States, European Union, and China derived by high-resolution  
inversion of ammonium wet deposition data: Interpretation with a new agricultural emissions  
inventory (MASAGE\_NH3), 119, 4343–4364, <https://doi.org/10.1002/2013JD021130>, 2014.

960 Paulot, F., Jacob, D. J., Johnson, M. T., Bell, T. G., Baker, A. R., Keene, W. C., Lima, I. D.,  
Doney, S. C., and Stock, C. A.: Global oceanic emission of ammonia: Constraints from  
seawater and atmospheric observations, 29, 1165–1178,  
<https://doi.org/10.1002/2015GB005106>, 2015.

Pleim, J. E., Bash, E. O., Walker, J. T., and Cooter, E. J.: Development and evaluation of an  
ammonia bidirectional flux parameterization for air quality models, 118, 3794–3806,  
<https://doi.org/10.1002/jgrd.50262>, 2013.

965 Pleim, J. E., Ran, L., Appel, W., Shephard, M. W., and Cady-Pereira, K.: New Bidirectional  
Ammonia Flux Model in an Air Quality Model Coupled With an Agricultural Model, *J. Adv.  
Model. Earth Syst.*, 11, 2934–2957, <https://doi.org/10.1029/2019MS001728>, 2019.

- Portmann, F. T., Siebert, S., and Döll, P.: MIRCA2000-Global monthly irrigated and rainfed crop areas around the year 2000: A new high-resolution data set for agricultural and hydrological modeling, 24, n/a-n/a, <https://doi.org/10.1029/2008gb003435>, 2010.
- Riddick, S., Ward, D., Hess, P., Mahowald, N., Massad, R., and Holland, E.: Estimate of changes in agricultural terrestrial nitrogen pathways and ammonia emissions from 1850 to present in the Community Earth System Model, 13, 3397–3426, <https://doi.org/10.5194/bg-13-3397-2016>, 2016.
- Saikawa, E., Schlosser, C. A., and Prinn, R. G.: Global modeling of soil nitrous oxide emissions from natural processes, 27, 972–989, <https://doi.org/10.1002/gbc.20087>, 2013.
- Saikawa, E., Prinn, R. G., Dlugokencky, E., Ishijima, K., Dutton, G. S., Hall, B. D., Langenfelds, R., Tohjima, Y., Machida, T., Manizza, M., Rigby, M., O'Doherty, S., Patra, P. K., Harth, C. M., Weiss, R. F., Krummel, P. B., Van Der Schoot, M., Fraser, P. J., Steele, L. P., Aoki, S., Nakazawa, T., and Elkins, J. W.: Global and regional emissions estimates for N<sub>2</sub>O, 14, 4617–4641, <https://doi.org/10.5194/acp-14-4617-2014>, 2014.
- Shou, W., Zong, H., Ding, P., and Hou, L.: A modelling approach to assess the effects of atmospheric nitrogen deposition on the marine ecosystem in the Bohai Sea, China, 208, 36–48, <https://doi.org/10.1016/j.ecss.2018.04.025>, 2018.
- Snider, G., Weagle, C. L., Murdymootoo, K. K., Ring, A., Ritchie, Y., Stone, E., Walsh, A., Akoshile, C., Anh, N. X., Balasubramanian, R., Brook, J., Qonitan, F. D., Dong, J., Griffith, D., He, K., Holben, B. N., Kahn, R., Lagrosas, N., Lestari, P., Ma, Z., Misra, A., Norford, L. K., Quel, E. J., Salam, A., Schichtel, B., Segev, L., Tripathi, S., Wang, C., Yu, C., Zhang, Q., Zhang, Y., Brauer, M., Cohen, A., Gibson, M. D., Liu, Y., Martins, J. V., Rudich, Y., and Martin, R. V.: Variation in global chemical composition of PM 2.5 : emerging results from SPARTAN, 16, 9629–9653, <https://doi.org/10.5194/acp-16-9629-2016>, 2016.
- Sutton, M. A.: The surface/atmosphere exchange of ammonia, University of Edinburgh, 1990.
- Sutton, M. A., Pitcairn, C. E., and Fowler, D.: The exchange of ammonia between the atmosphere and plant communities, 24, 301–393, 1993.
- Sutton, M. A., Reis, S., Riddick, S. N., Dragosits, U., Nemitz, E., Theobald, M. R., Tang, Y. S., Braban, C. F., Vieno, M., Dore, A. J., Mitchell, R. F., Wanless, S., Daunt, F., Fowler, D., Blackall, T. D., Milford, C., Flechard, C. R., Loubet, B., Massad, R., Cellier, P., Personne, E., Coheur, P. F., Clarisse, L., Van Damme, M., Ngadi, Y., Clerbaux, C., Skjøth, C. A., Geels, C., Hertel, O., Kruit, R. J. W., Pinder, R. W., Bash, J. O., Walker, J. T., Simpson, D., Horváth, L., Misselbrook, T. H., Bleeker, A., Dentener, F., and de Vries, W.: Towards a climate-dependent paradigm of ammonia emission and deposition, 368, <https://doi.org/10.1098/rstb.2013.0166>, 2013.
- Tian, D. and Niu, S.: A global analysis of soil acidification caused by nitrogen addition, 10, <https://doi.org/10.1088/1748-9326/10/2/024019>, 2015.
- Tie, X. and Cao, J.: Aerosol pollution in China: Present and future impact on environment, 7, 426–431, <https://doi.org/10.1016/j.partic.2009.09.003>, 2009.

Twomey, S.: The Influence of Pollution on the Shortwave Albedo of Clouds, 34, 1149–1152, [https://doi.org/10.1175/1520-0469\(1977\)034<1149:TIOPOT>2.0.CO;2](https://doi.org/10.1175/1520-0469(1977)034<1149:TIOPOT>2.0.CO;2), 1977.

US Environmental Protection Agency: National Emission Inventory (NEI) Report, 2014.

1010 Vira, J., Hess, P., Melkonian, J., and Wieder, W. R.: An improved mechanistic model for ammonia volatilization in Earth system models: Flow of Agricultural Nitrogen version 2 (FANv2), *Geosci. Model Dev.*, 13, 4459–4490, <https://doi.org/10.5194/gmd-13-4459-2020>, 2020.

1015 Wang, J., Xing, J., Mathur, R., Pleim, J. E., Wang, S., Hogrefe, C., Gan, C. M., Wong, D. C., and Hao, J.: Historical trends in PM<sub>2.5</sub>-related premature mortality during 1990–2010 across the Northern Hemisphere, 125, 400–408, <https://doi.org/10.1289/EHP298>, 2017.

Wesely, M. L.: Parameterization of Surface Resistances to Gaseous Dry Deposition in Regional-Scale Numerical Models, 23, 1293–1304, <https://doi.org/10.1016/j.atmosenv.2007.10.058>, 1989.

1020 Whitburn, S., Van Damme, M., Clarisse, L., Hurtmans, D., Clerbaux, C., and Coheur, P. F.: IASI-derived NH<sub>3</sub> enhancement ratios relative to CO for the tropical biomass burning regions, 17, 12239–12252, <https://doi.org/10.5194/acp-17-12239-2017>, 2017.

Willem Asman; Mark A. Sutton: Ammonia : emission , atmospheric transport and deposition, 27–48, 1998.

1025 Wortman, E., Tomaszewski, T., Waldner, P., Schleppi, P., Thimonier, A., Eugster, W., Buchmann, N., and Sievering, H.: Atmospheric nitrogen deposition and canopy retention influences on photosynthetic performance at two high nitrogen deposition Swiss forests, 64, 17216, <https://doi.org/10.3402/tellusb.v64i0.17216>, 2012.

1030 Xing, Y. F., Xu, Y. H., Shi, M. H., and Lian, Y. X.: The impact of PM<sub>2.5</sub> on the human respiratory system, <https://doi.org/10.3978/j.issn.2072-1439.2016.01.19>, 2016.

Yang, Y., Ruan, Z., Wang, X., Yang, Y., Mason, T. G., Lin, H., and Tian, L.: Short-term and long-term exposures to fine particulate matter constituents and health: A systematic review and meta-analysis, 247, 874–882, <https://doi.org/10.1016/j.envpol.2018.12.060>, 2019.

1035 Zhang, J. and Liu, M. G.: Observations on nutrient elements and sulphate in atmospheric wet depositions over the northwest Pacific coastal oceans - Yellow Sea, 47, 173–189, [https://doi.org/10.1016/0304-4203\(94\)90107-4](https://doi.org/10.1016/0304-4203(94)90107-4), 1994.

Zhang, L., Chen, Y., Zhao, Y., Henze, D. K., Zhu, L., Song, Y., Paulot, F., Liu, X., Pan, Y., Lin, Y., and Huang, B.: Agricultural ammonia emissions in China: Reconciling bottom-up and top-down estimates, 18, 339–355, <https://doi.org/10.5194/acp-18-339-2018>, 2018.

1040 Zhang, Y. and Niu, H.: The development of the DNDC plant growth sub-model and the application of DNDC in agriculture: A review, 230, 271–282, <https://doi.org/10.1016/j.agee.2016.06.017>, 2016.



- 1045 Zhao, Y., Zhang, L., Tai, A. P. K., Chen, Y., and Pan, Y.: Responses of surface ozone air quality to anthropogenic nitrogen deposition in the Northern Hemisphere, 17, 9781–9796, <https://doi.org/10.5194/acp-17-9781-2017>, 2017.
- Zheng, Y., Xue, T., Zhang, Q., Geng, G., Tong, D., Li, X., and He, K.: Air quality improvements and health benefits from China’s clean air action since 2013, 12, <https://doi.org/10.1088/1748-9326/aa8a32>, 2017.
- 1050 Zhu, L., Henze, D., Bash, J., Jeong, G.-R., Cady-Pereira, K., Shephard, M., Luo, M., Paulot, F., and Capps, S.: Global evaluation of ammonia bidirectional exchange and livestock diurnal variation schemes, *Atmos. Chem. Phys.*, 15, 12823–12843, <https://doi.org/10.5194/acp-15-12823-2015>, 2015.
